# Supplementary material
Source: PubMed Central journal article supplement (PMC8256439)
Supplement: NIHMS1698229-supplement-Supplementary_tables.pdf [file NIHMS1698229-supplement-Supplementary_tables.pdf]

**Supplemental Table 1. Comparison of TUS-CPS (2014-2015), NHIS (2015), and PATH (2015-2016) methodology and current product use definitions**

|                                        | Tobacco Use Supplement to the Current Population Survey (TUS-CPS): 2014-2015                                                                                                                                                                                                                                                                                                                       | National Health Interview Survey (NHIS): 2015                                                                                                                                                                                                                                                                                                                                           | Population Assessment of Tobacco & Health (PATH): Wave 3; 2015-2016                                                                                                                               |
|----------------------------------------|----------------------------------------------------------------------------------------------------------------------------------------------------------------------------------------------------------------------------------------------------------------------------------------------------------------------------------------------------------------------------------------------------|-----------------------------------------------------------------------------------------------------------------------------------------------------------------------------------------------------------------------------------------------------------------------------------------------------------------------------------------------------------------------------------------|---------------------------------------------------------------------------------------------------------------------------------------------------------------------------------------------------|
| Sample size                            | 163,073                                                                                                                                                                                                                                                                                                                                                                                            | 33,672                                                                                                                                                                                                                                                                                                                                                                                  | 28,148                                                                                                                                                                                            |
| Response rate (formula)                | 54.2%<br>(percentage of self-respondents of all eligible survey sample)                                                                                                                                                                                                                                                                                                                            | Conditional response rate for the Sample Adult component: 79.7%, (calculated by dividing the number of completed Sample Adult interviews (33,672) by the total number of eligible sample adults (42,270)); Unconditional or final response rate for the Sample Adult component: 55.2% (calculated by multiplying the conditional rate of 79.7% by the final family response rate 69.3%) | 78.4%<br>(ratio of number of completed cases to number of cases eligible for Wave 3 interview among Wave 1 participants)                                                                          |
| Sampling frame                         | National two-stage sampling design of civilian, noninstitutionalized U.S. population (supplement to the Current Population Survey)                                                                                                                                                                                                                                                                 | National multistage, stratified, clustered sampling of civilian, noninstitutionalized U.S. population; Oversampled African American/Black, Hispanic, and Asian persons                                                                                                                                                                                                                  | National four-stage stratified area probability design of civilian, noninstitutionalized U.S. population; Oversampled tobacco users, young adults (aged 18-24), and African American/Black adults |
| Data collection method                 | Computer Assisted Telephone Interviewing (CATI) or Computer Assisted Personal Interviewing (CAPI)                                                                                                                                                                                                                                                                                                  | Computer Assisted Personal Interviewing (CAPI) or Telephone Interviewing                                                                                                                                                                                                                                                                                                                | Audio Computer-Assisted Self-Interviewing (ACASI)                                                                                                                                                 |
| <b>Current product use definitions</b> |                                                                                                                                                                                                                                                                                                                                                                                                    |                                                                                                                                                                                                                                                                                                                                                                                         |                                                                                                                                                                                                   |
| Cigarettes                             | Smoked $\geq$ 100 cigarettes in lifetime and now smoke cigarettes every day or some days                                                                                                                                                                                                                                                                                                           |                                                                                                                                                                                                                                                                                                                                                                                         |                                                                                                                                                                                                   |
| ENDS                                   | Now use an e-cigarette every day or some days [section includes the following language: The next question is about electronic or e-cigarettes. You may also know them as vape-pens, hookah-pens, e-hookahs, or e-vaporizers. Some look like cigarettes, and others look like pens or small pipes. These are battery-powered, usually contain liquid nicotine, and produce vapor instead of smoke.] | Now use electronic nicotine product [e-cigarettes, e-cigars, e-pipes, e-hookahs, something else] every day or some days                                                                                                                                                                                                                                                                 |                                                                                                                                                                                                   |

|                                     |                                                                                                                                                     |                                                                                                                                                                                                                                                     |                                                                                                                                                                                                                                                                                                                                                                                                                                                                     |
|-------------------------------------|-----------------------------------------------------------------------------------------------------------------------------------------------------|-----------------------------------------------------------------------------------------------------------------------------------------------------------------------------------------------------------------------------------------------------|---------------------------------------------------------------------------------------------------------------------------------------------------------------------------------------------------------------------------------------------------------------------------------------------------------------------------------------------------------------------------------------------------------------------------------------------------------------------|
| Traditional cigars                  | Now smoke a regular cigar, cigarillo, or little filtered cigar every day or some days                                                               |                                                                                                                                                                                                                                                     | Now smoke traditional cigars every day or some days                                                                                                                                                                                                                                                                                                                                                                                                                 |
| Cigarillos                          |                                                                                                                                                     |                                                                                                                                                                                                                                                     | Now smoke cigarillos (with or without a tip) every day or some days                                                                                                                                                                                                                                                                                                                                                                                                 |
| Filtered cigars                     |                                                                                                                                                     |                                                                                                                                                                                                                                                     | Now smoke filtered cigars every day or some days                                                                                                                                                                                                                                                                                                                                                                                                                    |
| Tobacco pipe                        | Now smoke a regular pipe filled with tobacco every day or some days                                                                                 | Now smoke a regular pipe, water pipe, or hookah every day or some days                                                                                                                                                                              | Now smoke a pipe filled with tobacco every day or some days                                                                                                                                                                                                                                                                                                                                                                                                         |
| Hookah                              | Now used a water pipe or hookah pipe filled with tobacco every day or some days                                                                     |                                                                                                                                                                                                                                                     | Now smoke hookah every day or some days                                                                                                                                                                                                                                                                                                                                                                                                                             |
| Smokeless tobacco (chew, dip, spit) | Now use smokeless tobacco such as moist snuff, dip, spit, chew tobacco, or snus every day or some days                                              | Now use smokeless tobacco products every day or some days [section includes the following language: Smokeless tobacco products are placed in the mouth or nose and can include chewing tobacco, snuff, dip, snus (SNOOSE), or dissolvable tobacco.] | Now use smokeless tobacco every day or some days [section includes the following language: The next questions ask about other types of smokeless tobacco products which you put in your mouth and chew, suck or spit. There are many types of smokeless tobacco products such as loose snus, moist snuff, dip, spit, and chewing tobacco. Common brands include Redman, Levi Garrett, Beechnut, Skoal, Grizzly, Copenhagen, and Kodiak, but there are many others.] |
| Snus                                |                                                                                                                                                     |                                                                                                                                                                                                                                                     | Now use snus pouches every day or some days                                                                                                                                                                                                                                                                                                                                                                                                                         |
| Dissolvable tobacco                 |                                                                                                                                                     |                                                                                                                                                                                                                                                     | Now use dissolvable tobacco every day or some days                                                                                                                                                                                                                                                                                                                                                                                                                  |
| Other combustible category          | Used any of the following products according to the definitions listed above: Traditional cigars, cigarillos, filtered cigars, tobacco pipe, hookah |                                                                                                                                                                                                                                                     |                                                                                                                                                                                                                                                                                                                                                                                                                                                                     |

|                    |                                                                                                                                       |                                                                                                                           |                                                                                                                                      |
|--------------------|---------------------------------------------------------------------------------------------------------------------------------------|---------------------------------------------------------------------------------------------------------------------------|--------------------------------------------------------------------------------------------------------------------------------------|
| Smokeless category | Used any of the following products according to the definitions listed above: moist snuff, dip, spit, chew, snus, dissolvable tobacco | Used any of the following products according to the definitions listed above: chew, snuff, dip, snus, dissolvable tobacco | Used any of the following products according to the definitions listed above: loose snus, moist snuff, dip, spit, chew, snus pouches |
|--------------------|---------------------------------------------------------------------------------------------------------------------------------------|---------------------------------------------------------------------------------------------------------------------------|--------------------------------------------------------------------------------------------------------------------------------------|

**Supplemental Table 2. Proportion of exclusive, dual, and polytobacco use among tobacco users: TUS-CPS (2014-2015), NHIS (2015), and PATH (2015-2016)**

|                                             | TUS-CPS (2014-2015)<br>n = 27,488 |      |        |      | NHIS (2015)<br>n = 6,575 |      |        |      | PATH (2015-2016)<br>n = 12,377 |      |        |      |
|---------------------------------------------|-----------------------------------|------|--------|------|--------------------------|------|--------|------|--------------------------------|------|--------|------|
|                                             | n                                 | %    | 95% CI |      | n                        | %    | 95% CI |      | n                              | %    | 95% CI |      |
|                                             |                                   |      | LB     | UB   |                          |      | LB     | UB   |                                |      | LB     | UB   |
| Exclusive use                               | 23,119                            | 83.3 | 82.9   | 83.7 | 5,271                    | 80.5 | 79.1   | 81.8 | 8,906                          | 74.5 | 73.7   | 75.4 |
| Cigarettes                                  | 17,740                            | 63.1 | 62.6   | 63.5 | 3,897                    | 55.9 | 54.0   | 57.7 | 6,089                          | 50.2 | 49.0   | 51.4 |
| ENDS                                        | 1,014                             | 3.9  | 3.7    | 4.1  | 317                      | 6.2  | 5.5    | 7.0  | 726                            | 5.6  | 5.1    | 6.2  |
| Other combustibles                          | 2,352                             | 9.6  | 9.2    | 9.9  | 635                      | 11.5 | 10.3   | 12.7 | 1,416                          | 12.2 | 11.4   | 13.1 |
| Smokeless                                   | 2,013                             | 6.7  | 6.5    | 7.0  | 422                      | 6.9  | 6.0    | 8.0  | 675                            | 6.5  | 5.8    | 7.2  |
| Dual use                                    | 3,937                             | 14.9 | 14.6   | 15.3 | 1,147                    | 16.9 | 15.7   | 18.2 | 2,715                          | 20.3 | 19.5   | 21.1 |
| Cigarettes + ENDS                           | 2,142                             | 7.7  | 7.4    | 8.0  | 543                      | 8.0  | 7.1    | 8.9  | 904                            | 7.2  | 6.6    | 7.8  |
| Cigarettes + other combustibles             | 1,093                             | 4.5  | 4.3    | 4.8  | 388                      | 5.4  | 4.7    | 6.1  | 1,049                          | 7.7  | 7.2    | 8.3  |
| Cigarettes + smokeless                      | 377                               | 1.3  | 1.2    | 1.4  | 110                      | 1.8  | 1.4    | 2.4  | 233                            | 1.9  | 1.7    | 2.2  |
| ENDS + other combustibles                   | 122                               | 0.6  | 0.5    | 0.7  | 31                       | 0.6  | 0.4    | 0.9  | 366                            | 2.3  | 2.0    | 2.6  |
| ENDS + smokeless                            | 41                                | 0.2  | 0.1    | 0.2  | 12                       | 0.2  | 0.1    | 0.4  | 35                             | 0.2  | 0.2    | 0.4  |
| Other combustibles + smokeless              | 162                               | 0.6  | 0.6    | 0.7  | 63                       | 1.0  | 0.7    | 1.5  | 128                            | 1.0  | 0.8    | 1.2  |
| Poly use                                    | 432                               | 1.8  | 1.7    | 2.0  | 157                      | 2.6  | 2.1    | 3.3  | 756                            | 5.2  | 4.8    | 5.6  |
| Cigarettes + ENDS + other combustibles      | 229                               | 1.0  | 0.9    | 1.1  | 89                       | 1.5  | 1.1    | 2.0  | 416                            | 2.8  | 2.5    | 3.2  |
| Cigarettes + ENDS + smokeless               | 71                                | 0.3  | 0.2    | 0.4  | 20                       | 0.3  | 0.2    | 0.6  | 71                             | 0.5  | 0.4    | 0.6  |
| Cigarettes + other combustibles + smokeless | 92                                | 0.4  | 0.3    | 0.5  | 34                       | 0.6  | 0.3    | 0.9  | 121                            | 0.9  | 0.7    | 1.1  |
| ENDS + other combustibles + smokeless       | 6                                 | 0.0  | 0.0    | 0.0  | 4                        | 0.0  | 0.0    | 0.1  | 42                             | 0.3  | 0.2    | 0.5  |
| All four groups                             | 34                                | 0.2  | 0.1    | 0.2  | 10                       | 0.2  | 0.1    | 0.6  | 106                            | 0.7  | 0.6    | 0.9  |

n = unweighted sample size; % = weighted percentage

ENDS = Electronic Nicotine Delivery Systems

**Supplemental Table 3a. Population prevalence of single, dual, and polytobacco use by sex: TUS-CPS (2014-2015), NHIS (2015), and PATH (2015-2016)**

|                                             | TUS-CPS (2014-2015) |      |        |      |                    |      |        |      |
|---------------------------------------------|---------------------|------|--------|------|--------------------|------|--------|------|
|                                             | Men (n = 69,355)    |      |        |      | Women (n = 85,712) |      |        |      |
|                                             | n                   | %    | 95% CI |      | n                  | %    | 95% CI |      |
|                                             |                     |      | LB     | UB   |                    |      | LB     | UB   |
| Non-user                                    | 53,862              | 78.4 | 78.1   | 78.6 | 73,717             | 86.8 | 86.6   | 87.0 |
| Exclusive use                               | 12,819              | 17.8 | 17.5   | 18.0 | 10,300             | 11.3 | 11.1   | 11.4 |
| Cigarettes                                  | 8,410               | 11.7 | 11.6   | 11.9 | 9,330              | 10.1 | 9.9    | 10.3 |
| ENDS                                        | 519                 | 0.8  | 0.8    | 0.9  | 495                | 0.5  | 0.5    | 0.6  |
| Other combustibles                          | 1,979               | 2.9  | 2.8    | 3.0  | 373                | 0.5  | 0.5    | 0.6  |
| Smokeless                                   | 1,911               | 2.3  | 2.2    | 2.4  | 102                | 0.1  | 0.1    | 0.1  |
| Dual use                                    | 2,347               | 3.4  | 3.3    | 3.5  | 1,590              | 1.8  | 1.7    | 1.9  |
| Cigarettes + ENDS                           | 876                 | 1.2  | 1.2    | 1.3  | 1,266              | 1.4  | 1.3    | 1.5  |
| Cigarettes + other combustibles             | 831                 | 1.3  | 1.2    | 1.3  | 262                | 0.3  | 0.3    | 0.4  |
| Cigarettes + smokeless                      | 354                 | 0.4  | 0.4    | 0.5  | 23                 | 0.0  | 0.0    | 0.0  |
| ENDS + other combustibles                   | 88                  | 0.2  | 0.1    | 0.2  | 34                 | 0.0  | 0.0    | 0.1  |
| ENDS + smokeless                            | 37                  | 0.0  | 0.0    | 0.1  | 4                  | 0.0  | 0.0    | 0.0  |
| Other combustibles + smokeless              | 161                 | 0.2  | 0.2    | 0.3  | 1                  | 0.0  | 0.0    | 0.0  |
| Poly use                                    | 327                 | 0.5  | 0.5    | 0.6  | 105                | 0.1  | 0.1    | 0.2  |
| Cigarettes + ENDS + other combustibles      | 141                 | 0.2  | 0.2    | 0.3  | 88                 | 0.1  | 0.1    | 0.1  |
| Cigarettes + ENDS + smokeless               | 61                  | 0.1  | 0.1    | 0.1  | 10                 | 0.0  | 0.0    | 0.0  |
| Cigarettes + other combustibles + smokeless | 87                  | 0.1  | 0.1    | 0.2  | 5                  | 0.0  | 0.0    | 0.0  |
| ENDS + other combustibles + smokeless       | 6                   | 0.0  | 0.0    | 0.0  | 0                  | 0.0  |        |      |
| All four groups                             | 32                  | 0.1  | 0.0    | 0.1  | 2                  | 0.0  | 0.0    | 0.0  |

**Supplemental Table 3a. Population prevalence of exclusive, dual, and polytobacco use by sex: TUS-CPS (2014-2015), NHIS (2015), and PATH (2015-2016) – CONTINUED**

|                                             | NHIS (2015)      |      |        |      |                    |      |        |      |
|---------------------------------------------|------------------|------|--------|------|--------------------|------|--------|------|
|                                             | Men (n = 14,198) |      |        |      | Women (n = 17,482) |      |        |      |
|                                             | n                | %    | 95% CI |      | n                  | %    | 95% CI |      |
|                                             |                  |      | LB     | UB   |                    |      | LB     | UB   |
| Non-user                                    | 10,431           | 74.4 | 73.2   | 75.4 | 14,674             | 84.6 | 83.9   | 85.3 |
| Exclusive use                               | 2,900            | 19.9 | 18.9   | 20.9 | 2,371              | 13.1 | 12.4   | 13.8 |
| Cigarettes                                  | 1,814            | 11.5 | 10.8   | 12.3 | 2,083              | 11.2 | 10.6   | 11.9 |
| ENDS                                        | 181              | 1.7  | 1.4    | 2.0  | 136                | 0.9  | 0.7    | 1.1  |
| Other combustibles                          | 510              | 3.9  | 3.5    | 4.4  | 125                | 0.8  | 0.7    | 1.1  |
| Smokeless                                   | 395              | 2.8  | 2.4    | 3.2  | 27                 | 0.1  | 0.1    | 0.2  |
| Dual use                                    | 738              | 4.9  | 4.4    | 5.4  | 409                | 2.1  | 1.8    | 2.5  |
| Cigarettes + ENDS                           | 246              | 1.7  | 1.5    | 2.0  | 297                | 1.5  | 1.3    | 1.8  |
| Cigarettes + other combustibles             | 299              | 1.7  | 1.5    | 2.0  | 89                 | 0.5  | 0.4    | 0.7  |
| Cigarettes + smokeless                      | 100              | 0.7  | 0.5    | 1.0  | 10                 | 0.0  | 0.0    | 0.1  |
| ENDS + other combustibles                   | 21               | 0.2  | 0.1    | 0.3  | 10                 | 0.1  | 0.0    | 0.1  |
| ENDS + smokeless                            | 11               | 0.1  | 0.0    | 0.2  | 1                  | 0.0  | 0.0    | 0.0  |
| Other combustibles + smokeless              | 61               | 0.4  | 0.3    | 0.6  | 2                  | 0.0  | 0.0    | 0.0  |
| Poly use                                    | 129              | 0.9  | 0.7    | 1.1  | 28                 | 0.2  | 0.1    | 0.3  |
| Cigarettes + ENDS + other combustibles      | 65               | 0.5  | 0.3    | 0.6  | 24                 | 0.1  | 0.1    | 0.3  |
| Cigarettes + ENDS + smokeless               | 19               | 0.1  | 0.1    | 0.2  | 1                  | 0.0  | 0.0    | 0.0  |
| Cigarettes + other combustibles + smokeless | 32               | 0.2  | 0.1    | 0.3  | 2                  | 0.0  | 0.0    | 0.2  |
| ENDS + other combustibles + smokeless       | 3                | 0.0  | 0.0    | 0.0  | 1                  | 0.0  | 0.0    | 0.1  |
| All four groups                             | 10               | 0.1  | 0.0    | 0.2  | 0                  | 0.0  | 0.0    | 0.0  |

**Supplemental Table 3a. Population prevalence of exclusive, dual, and polytobacco use by sex: TUS-CPS (2014-2015), NHIS (2015), and PATH (2015-2016) – CONTINUED**

|  | PATH (2015-2016) |
|--|------------------|
|--|------------------|

|                                             | Men (n = 13,741) |      |        |      | Women (n = 14,303) |      |        |      |
|---------------------------------------------|------------------|------|--------|------|--------------------|------|--------|------|
|                                             | n                | %    | 95% CI |      | n                  | %    | 95% CI |      |
|                                             |                  |      | LB     | UB   |                    |      | LB     | UB   |
| Non-user                                    | 6,879            | 68.3 | 67.4   | 69.1 | 8,793              | 80.3 | 79.5   | 81.1 |
| Exclusive use                               | 4,716            | 22.8 | 22.1   | 23.5 | 4,185              | 15.4 | 14.7   | 16.1 |
| Cigarettes                                  | 2,767            | 13.1 | 12.6   | 13.7 | 3,320              | 12.5 | 11.9   | 13.1 |
| ENDS                                        | 373              | 1.6  | 1.4    | 1.8  | 352                | 1.3  | 1.1    | 1.5  |
| Other combustibles                          | 936              | 4.9  | 4.5    | 5.3  | 479                | 1.5  | 1.3    | 1.7  |
| Smokeless                                   | 640              | 3.3  | 2.9    | 3.7  | 34                 | 0.1  | 0.1    | 0.3  |
| Dual use                                    | 1,616            | 6.9  | 6.5    | 7.3  | 1,099              | 3.6  | 3.3    | 3.8  |
| Cigarettes + ENDS                           | 374              | 1.7  | 1.5    | 2.0  | 530                | 1.9  | 1.7    | 2.1  |
| Cigarettes + other combustibles             | 669              | 2.9  | 2.6    | 3.1  | 380                | 1.1  | 1.0    | 1.3  |
| Cigarettes + smokeless                      | 209              | 0.9  | 0.8    | 1.1  | 24                 | 0.1  | 0.0    | 0.1  |
| ENDS + other combustibles                   | 206              | 0.8  | 0.6    | 0.9  | 160                | 0.4  | 0.4    | 0.5  |
| ENDS + smokeless                            | 34               | 0.1  | 0.1    | 0.2  | 1                  | 0.0  | 0.0    | 0.0  |
| Other combustibles + smokeless              | 124              | 0.5  | 0.4    | 0.6  | 4                  | 0.0  | 0.0    | 0.0  |
| Poly use                                    | 530              | 2.0  | 1.8    | 2.2  | 226                | 0.7  | 0.6    | 0.8  |
| Cigarettes + ENDS + other combustibles      | 231              | 0.9  | 0.7    | 1.0  | 185                | 0.6  | 0.5    | 0.7  |
| Cigarettes + ENDS + smokeless               | 61               | 0.2  | 0.2    | 0.3  | 10                 | 0.0  | 0.0    | 0.1  |
| Cigarettes + other combustibles + smokeless | 109              | 0.4  | 0.3    | 0.5  | 12                 | 0.0  | 0.0    | 0.1  |
| ENDS + other combustibles + smokeless       | 40               | 0.1  | 0.1    | 0.3  | 2                  | 0.0  | 0.0    | 0.0  |
| All four groups                             | 89               | 0.3  | 0.3    | 0.4  | 17                 | 0.1  | 0.0    | 0.1  |

n = unweighted sample size; % = weighted percentage

ENDS = Electronic Nicotine Delivery Systems

**Supplemental Table 3b. Proportion of exclusive, dual, and polytobacco use among tobacco users by sex: TUS-CPS (2014-2015), NHIS (2015), and PATH (2015-2016)**

|  | TUS-CPS (2014-2015) |   |        |                    |   |        |
|--|---------------------|---|--------|--------------------|---|--------|
|  | Men (n = 15,493)    |   |        | Women (n = 11,995) |   |        |
|  | n                   | % | 95% CI | n                  | % | 95% CI |
|  |                     |   |        |                    |   |        |

|                                             |        |      | LB   | UB   |        |      | LB   | UB   |
|---------------------------------------------|--------|------|------|------|--------|------|------|------|
| Exclusive use                               | 12,819 | 82.0 | 81.5 | 82.5 | 10,300 | 85.2 | 84.6 | 85.7 |
| Cigarettes                                  | 8,410  | 54.2 | 53.5 | 54.8 | 9,330  | 76.5 | 75.9 | 77.1 |
| ENDS                                        | 519    | 3.8  | 3.6  | 4.1  | 495    | 4.1  | 3.8  | 4.4  |
| Other combustibles                          | 1,979  | 13.3 | 12.8 | 13.8 | 373    | 3.9  | 3.5  | 4.2  |
| Smokeless                                   | 1,911  | 10.7 | 10.3 | 11.2 | 102    | 0.7  | 0.6  | 0.8  |
| Dual use                                    | 2,347  | 15.7 | 15.2 | 16.2 | 1,590  | 13.8 | 13.3 | 14.3 |
| Cigarettes + ENDS                           | 876    | 5.7  | 5.4  | 6.1  | 1,266  | 10.6 | 10.2 | 11.1 |
| Cigarettes + other combustibles             | 831    | 5.9  | 5.5  | 6.2  | 262    | 2.6  | 2.3  | 2.8  |
| Cigarettes + smokeless                      | 354    | 2.0  | 1.8  | 2.2  | 23     | 0.2  | 0.1  | 0.3  |
| ENDS + other combustibles                   | 88     | 0.8  | 0.7  | 1.0  | 34     | 0.4  | 0.3  | 0.5  |
| ENDS + smokeless                            | 37     | 0.2  | 0.2  | 0.3  | 4      | 0.0  | 0.0  | 0.1  |
| Other combustibles + smokeless              | 161    | 1.0  | 0.9  | 1.2  | 1      | 0.0  | 0.0  | 0.1  |
| Poly use                                    | 327    | 2.3  | 2.1  | 2.6  | 105    | 1.0  | 0.9  | 1.2  |
| Cigarettes + ENDS + other combustibles      | 141    | 1.0  | 0.9  | 1.2  | 88     | 0.9  | 0.7  | 1.1  |
| Cigarettes + ENDS + smokeless               | 61     | 0.4  | 0.4  | 0.5  | 10     | 0.1  | 0.1  | 0.1  |
| Cigarettes + other combustibles + smokeless | 87     | 0.6  | 0.5  | 0.7  | 5      | 0.0  | 0.0  | 0.0  |
| ENDS + other combustibles + smokeless       | 6      | 0.0  | 0.0  | 0.1  | 0      | 0.0  |      |      |
| All four groups                             | 32     | 0.2  | 0.2  | 0.3  | 2      | 0.0  | 0.0  | 0.1  |

**Supplemental Table 3b. Proportion of exclusive, dual, and polytobacco use among tobacco users by sex: TUS-CPS (2014-2015), NHIS (2015), and PATH (2015-2016) – CONTINUED**

|                    | NHIS (2015)     |      |        |      |                   |      |        |      |
|--------------------|-----------------|------|--------|------|-------------------|------|--------|------|
|                    | Men (n = 3,767) |      |        |      | Women (n = 2,808) |      |        |      |
|                    | n               | %    | 95% CI |      | n                 | %    | 95% CI |      |
|                    |                 |      | LB     | UB   |                   |      | LB     | UB   |
| Exclusive use      | 2,900           | 77.5 | 75.7   | 79.3 | 2,371             | 85.0 | 82.9   | 86.9 |
| Cigarettes         | 1,814           | 45.0 | 42.8   | 47.2 | 2,083             | 72.8 | 70.3   | 75.2 |
| ENDS               | 181             | 6.5  | 5.5    | 7.6  | 136               | 5.8  | 4.7    | 7.2  |
| Other combustibles | 510             | 15.3 | 13.7   | 17.0 | 125               | 5.5  | 4.3    | 7.0  |

|                                             |     |      |      |      |     |      |      |      |
|---------------------------------------------|-----|------|------|------|-----|------|------|------|
| Smokeless                                   | 395 | 10.8 | 9.3  | 12.5 | 27  | 0.9  | 0.6  | 1.4  |
| Dual use                                    | 738 | 18.9 | 17.3 | 20.7 | 409 | 13.8 | 12.0 | 15.8 |
| Cigarettes + ENDS                           | 246 | 6.7  | 5.7  | 7.9  | 297 | 9.8  | 8.4  | 11.5 |
| Cigarettes + other combustibles             | 299 | 6.7  | 5.7  | 7.9  | 89  | 3.2  | 2.4  | 4.3  |
| Cigarettes + smokeless                      | 100 | 2.9  | 2.1  | 3.8  | 10  | 0.2  | 0.1  | 0.4  |
| ENDS + other combustibles                   | 21  | 0.7  | 0.4  | 1.1  | 10  | 0.5  | 0.2  | 1.0  |
| ENDS + smokeless                            | 11  | 0.3  | 0.1  | 0.6  | 1   | 0.0  | 0.0  | 0.1  |
| Other combustibles + smokeless              | 61  | 1.7  | 1.1  | 2.5  | 2   | 0.0  | 0.0  | 0.2  |
| Poly use                                    | 129 | 3.5  | 2.8  | 4.5  | 28  | 1.2  | 0.7  | 2.1  |
| Cigarettes + ENDS + other combustibles      | 65  | 1.8  | 1.3  | 2.5  | 24  | 1.0  | 0.5  | 1.7  |
| Cigarettes + ENDS + smokeless               | 19  | 0.5  | 0.3  | 0.9  | 1   | 0.0  | 0.0  | 0.1  |
| Cigarettes + other combustibles + smokeless | 32  | 0.8  | 0.5  | 1.3  | 2   | 0.2  | 0.0  | 1.3  |
| ENDS + other combustibles + smokeless       | 3   | 0.0  | 0.0  | 0.1  | 1   | 0.0  | 0.0  | 0.4  |
| All four groups                             | 10  | 0.4  | 0.2  | 0.9  | 0   | 0.0  | 0.0  | 0.0  |

**Supplemental Table 3b. Proportion of exclusive, dual, and polytobacco use among tobacco users by sex: TUS-CPS (2014-2015), NHIS (2015), and PATH (2015-2016) – CONTINUED**

|                                 | PATH (2015-2016) |      |        |      |                   |      |        |      |
|---------------------------------|------------------|------|--------|------|-------------------|------|--------|------|
|                                 | Men (n = 6,862)  |      |        |      | Women (n = 5,510) |      |        |      |
|                                 | n                | %    | 95% CI |      | n                 | %    | 95% CI |      |
| LB                              |                  |      | UB     | LB   |                   |      | UB     |      |
| Exclusive use                   | 4,716            | 72.0 | 70.8   | 73.1 | 4,185             | 78.3 | 77.2   | 79.5 |
| Cigarettes                      | 2,767            | 41.4 | 39.9   | 42.9 | 3,320             | 63.4 | 61.9   | 64.8 |
| ENDS                            | 373              | 5.0  | 4.3    | 5.7  | 352               | 6.6  | 5.7    | 7.7  |
| Other combustibles              | 936              | 15.3 | 14.1   | 16.6 | 479               | 7.6  | 6.8    | 8.4  |
| Smokeless                       | 640              | 10.3 | 9.2    | 11.5 | 34                | 0.8  | 0.4    | 1.3  |
| Dual use                        | 1,616            | 21.8 | 20.7   | 22.9 | 1,099             | 18.1 | 17.1   | 19.1 |
| Cigarettes + ENDS               | 374              | 5.5  | 4.9    | 6.2  | 530               | 9.7  | 8.9    | 10.7 |
| Cigarettes + other combustibles | 669              | 9.0  | 8.3    | 9.8  | 380               | 5.7  | 5.1    | 6.4  |



|                                             |     |     |     |     |     |     |     |     |
|---------------------------------------------|-----|-----|-----|-----|-----|-----|-----|-----|
| Cigarettes + smokeless                      | 209 | 2.9 | 2.6 | 3.4 | 24  | 0.3 | 0.2 | 0.5 |
| ENDS + other combustibles                   | 206 | 2.4 | 2.0 | 2.8 | 160 | 2.1 | 1.8 | 2.6 |
| ENDS + smokeless                            | 34  | 0.4 | 0.3 | 0.6 | 1   | 0.0 | 0.0 | 0.2 |
| Other combustibles + smokeless              | 124 | 1.6 | 1.3 | 1.9 | 4   | 0.1 | 0.0 | 0.2 |
| Poly use                                    | 530 | 6.2 | 5.7 | 6.8 | 226 | 3.6 | 3.1 | 4.2 |
| Cigarettes + ENDS + other combustibles      | 231 | 2.7 | 2.4 | 3.2 | 185 | 2.9 | 2.4 | 3.5 |
| Cigarettes + ENDS + smokeless               | 61  | 0.7 | 0.5 | 0.9 | 10  | 0.2 | 0.1 | 0.4 |
| Cigarettes + other combustibles + smokeless | 109 | 1.3 | 1.1 | 1.7 | 12  | 0.2 | 0.1 | 0.4 |
| ENDS + other combustibles + smokeless       | 40  | 0.5 | 0.3 | 0.9 | 2   | 0.0 | 0.0 | 0.1 |
| All four groups                             | 89  | 1.0 | 0.8 | 1.3 | 17  | 0.3 | 0.1 | 0.5 |

n = unweighted sample size; % = weighted percentage

ENDS = Electronic Nicotine Delivery Systems

**Supplemental Table 4a. Population prevalence of exclusive, dual, and polytobacco use by race/ethnicity: TUS-CPS (2014-2015), NHIS (2015), and PATH (2015-2016)**

|                                 | TUS-CPS (2014-2015)    |      |        |      |                       |      |        |      |                       |      |        |      |                      |      |        |      |
|---------------------------------|------------------------|------|--------|------|-----------------------|------|--------|------|-----------------------|------|--------|------|----------------------|------|--------|------|
|                                 | NH White (n = 113,288) |      |        |      | NH Black (n = 15,451) |      |        |      | Hispanic (n = 16,370) |      |        |      | NH Other (n = 9,958) |      |        |      |
|                                 | n                      | %    | 95% CI |      | n                     | %    | 95% CI |      | n                     | %    | 95% CI |      | n                    | %    | 95% CI |      |
|                                 |                        |      | LB     | UB   |                       |      | LB     | UB   |                       |      | LB     | UB   |                      |      | LB     | UB   |
| Non-user                        | 91,863                 | 80.6 | 80.4   | 80.8 | 12,733                | 82.9 | 82.4   | 83.5 | 14,574                | 89.1 | 88.7   | 89.5 | 8,409                | 87.2 | 86.6   | 87.7 |
| Exclusive use                   | 17,897                 | 16.0 | 15.8   | 16.2 | 2,389                 | 14.8 | 14.3   | 15.4 | 1,534                 | 9.2  | 8.9    | 9.6  | 1,299                | 10.5 | 10.0   | 10.9 |
| Cigarettes                      | 13,405                 | 11.8 | 11.6   | 12.0 | 2,014                 | 12.1 | 11.6   | 12.6 | 1,280                 | 7.5  | 7.2    | 7.8  | 1,041                | 8.4  | 8.0    | 8.9  |
| ENDS                            | 833                    | 0.8  | 0.8    | 0.9  | 46                    | 0.3  | 0.3    | 0.4  | 72                    | 0.4  | 0.4    | 0.5  | 63                   | 0.5  | 0.4    | 0.7  |
| Other combustibles              | 1,837                  | 1.8  | 1.7    | 1.9  | 257                   | 2.0  | 1.8    | 2.3  | 147                   | 1.1  | 0.9    | 1.2  | 111                  | 0.9  | 0.8    | 1.1  |
| Smokeless                       | 1,822                  | 1.6  | 1.5    | 1.7  | 72                    | 0.4  | 0.3    | 0.5  | 35                    | 0.2  | 0.2    | 0.3  | 84                   | 0.6  | 0.5    | 0.7  |
| Dual use                        | 3,177                  | 3.0  | 2.9    | 3.1  | 302                   | 2.0  | 1.9    | 2.3  | 233                   | 1.4  | 1.3    | 1.6  | 225                  | 2.1  | 1.9    | 2.3  |
| Cigarettes + ENDS               | 1,813                  | 1.7  | 1.6    | 1.7  | 111                   | 0.7  | 0.6    | 0.8  | 100                   | 0.5  | 0.4    | 0.6  | 118                  | 1.2  | 1.0    | 1.4  |
| Cigarettes + other combustibles | 756                    | 0.8  | 0.7    | 0.8  | 167                   | 1.2  | 1.0    | 1.4  | 103                   | 0.7  | 0.6    | 0.8  | 67                   | 0.6  | 0.4    | 0.7  |

|                                             |     |     |     |     |    |     |     |     |    |     |     |     |    |     |     |     |
|---------------------------------------------|-----|-----|-----|-----|----|-----|-----|-----|----|-----|-----|-----|----|-----|-----|-----|
| Cigarettes + smokeless                      | 333 | 0.3 | 0.3 | 0.3 | 10 | 0.1 | 0.0 | 0.1 | 9  | 0.0 | 0.0 | 0.1 | 25 | 0.1 | 0.1 | 0.2 |
| ENDS + other combustibles                   | 84  | 0.1 | 0.1 | 0.1 | 11 | 0.1 | 0.1 | 0.2 | 18 | 0.1 | 0.1 | 0.2 | 9  | 0.1 | 0.1 | 0.2 |
| ENDS + smokeless                            | 37  | 0.0 | 0.0 | 0.0 | 2  | 0.0 | 0.0 | 0.1 | 0  | 0.0 |     |     | 2  | 0.0 | 0.0 | 0.1 |
| Other combustibles + smokeless              | 154 | 0.2 | 0.1 | 0.2 | 1  | 0.0 | 0.0 | 0.0 | 3  | 0.0 | 0.0 | 0.0 | 4  | 0.0 | 0.0 | 0.1 |
| Poly use                                    | 351 | 0.4 | 0.3 | 0.4 | 27 | 0.2 | 0.1 | 0.2 | 29 | 0.2 | 0.1 | 0.3 | 25 | 0.3 | 0.2 | 0.4 |
| Cigarettes + ENDS + other combustibles      | 177 | 0.2 | 0.2 | 0.2 | 22 | 0.1 | 0.1 | 0.2 | 20 | 0.1 | 0.1 | 0.2 | 10 | 0.1 | 0.1 | 0.2 |
| Cigarettes + ENDS + smokeless               | 63  | 0.1 | 0.1 | 0.1 | 2  | 0.0 | 0.0 | 0.0 | 3  | 0.0 | 0.0 | 0.0 | 3  | 0.0 | 0.0 | 0.1 |
| Cigarettes + other combustibles + smokeless | 77  | 0.1 | 0.1 | 0.1 | 2  | 0.0 | 0.0 | 0.0 | 4  | 0.0 | 0.0 | 0.1 | 9  | 0.1 | 0.1 | 0.2 |
| ENDS + other combustibles + smokeless       | 4   | 0.0 | 0.0 | 0.0 | 1  | 0.0 | 0.0 | 0.0 | 1  | 0.0 | 0.0 | 0.0 | 0  | 0.0 |     |     |
| All four groups                             | 30  | 0.0 | 0.0 | 0.0 | 0  | 0.0 |     |     | 1  | 0.0 | 0.0 | 0.0 | 3  | 0.1 | 0.0 | 0.2 |

**Supplemental Table 4a. Population prevalence of exclusive, dual, and polytobacco use by race/ethnicity: TUS-CPS (2014-2015), NHIS (2015), and PATH (2015-2016) – CONTINUED**

|                    | NHIS (2015)           |      |        |      |                      |      |        |      |                      |      |        |      |                      |      |        |      |
|--------------------|-----------------------|------|--------|------|----------------------|------|--------|------|----------------------|------|--------|------|----------------------|------|--------|------|
|                    | NH White (n = 19,737) |      |        |      | NH Black (n = 4,092) |      |        |      | Hispanic (n = 5,262) |      |        |      | NH Other (n = 2,589) |      |        |      |
|                    | n                     | %    | 95% CI |      | n                    | %    | 95% CI |      | n                    | %    | 95% CI |      | n                    | %    | 95% CI |      |
|                    |                       |      | LB     | UB   |                      |      | LB     | UB   |                      |      | LB     | UB   |                      |      | LB     | UB   |
| Non-user           | 15,220                | 77.2 | 76.2   | 78.1 | 3,220                | 79.1 | 77.2   | 80.8 | 4,502                | 87.0 | 85.7   | 88.1 | 2,163                | 86.7 | 85.0   | 88.3 |
| Exclusive use      | 3,555                 | 18.2 | 17.4   | 19.0 | 730                  | 17.2 | 15.6   | 18.9 | 658                  | 11.4 | 10.3   | 12.6 | 328                  | 10.0 | 8.6    | 11.5 |
| Cigarettes         | 2,543                 | 12.3 | 11.6   | 13.0 | 584                  | 12.9 | 11.6   | 14.3 | 521                  | 8.5  | 7.6    | 9.5  | 249                  | 7.2  | 6.1    | 8.5  |
| ENDS               | 242                   | 1.5  | 1.3    | 1.8  | 22                   | 0.5  | 0.3    | 0.8  | 35                   | 0.9  | 0.6    | 1.4  | 18                   | 0.9  | 0.5    | 1.6  |
| Other combustibles | 401                   | 2.4  | 2.1    | 2.7  | 101                  | 3.3  | 2.6    | 4.3  | 85                   | 1.7  | 1.3    | 2.3  | 48                   | 1.5  | 1.0    | 2.2  |



|                                             |       |      |      |      |       |      |      |      |       |      |      |      |       |      |      |      |
|---------------------------------------------|-------|------|------|------|-------|------|------|------|-------|------|------|------|-------|------|------|------|
| Non-user                                    | 8,462 | 73.4 | 72.5 | 74.2 | 2,278 | 69.8 | 68.2 | 71.3 | 3,502 | 80.3 | 79.0 | 81.6 | 1,221 | 80.3 | 78.5 | 82.0 |
| Exclusive use                               | 5,591 | 19.8 | 19.2 | 20.5 | 1,336 | 23.1 | 21.7 | 24.5 | 1,224 | 14.7 | 13.6 | 15.9 | 596   | 13.9 | 12.5 | 15.5 |
| Cigarettes                                  | 3,806 | 13.1 | 12.5 | 13.7 | 935   | 16.3 | 15.1 | 17.7 | 820   | 10.3 | 9.4  | 11.3 | 400   | 9.0  | 8.0  | 10.1 |
| ENDS                                        | 484   | 1.6  | 1.4  | 1.8  | 69    | 1.2  | 0.9  | 1.6  | 114   | 1.2  | 0.9  | 1.4  | 56    | 1.3  | 0.8  | 1.9  |
| Other combustibles                          | 726   | 2.9  | 2.6  | 3.2  | 307   | 5.0  | 4.3  | 5.8  | 266   | 3.0  | 2.5  | 3.5  | 103   | 2.9  | 2.2  | 3.8  |
| Smokeless                                   | 575   | 2.2  | 2.0  | 2.5  | 25    | 0.6  | 0.3  | 1.0  | 24    | 0.3  | 0.2  | 0.4  | 37    | 0.8  | 0.5  | 1.3  |
| Dual use                                    | 1,710 | 5.5  | 5.1  | 5.8  | 368   | 6.0  | 5.4  | 6.7  | 377   | 3.8  | 3.3  | 4.4  | 226   | 4.5  | 3.6  | 5.4  |
| Cigarettes + ENDS                           | 688   | 2.3  | 2.1  | 2.5  | 61    | 1.0  | 0.8  | 1.3  | 87    | 1.0  | 0.7  | 1.3  | 62    | 1.2  | 0.9  | 1.7  |
| Cigarettes + other combustibles             | 554   | 1.7  | 1.6  | 1.9  | 229   | 3.7  | 3.2  | 4.3  | 155   | 1.6  | 1.3  | 2.0  | 91    | 1.8  | 1.3  | 2.4  |
| Cigarettes + smokeless                      | 196   | 0.6  | 0.6  | 0.7  | 4     | 0.1  | 0.0  | 0.3  | 15    | 0.2  | 0.1  | 0.3  | 16    | 0.4  | 0.2  | 0.6  |
| ENDS + other combustibles                   | 148   | 0.4  | 0.3  | 0.5  | 65    | 1.0  | 0.7  | 1.3  | 111   | 1.0  | 0.8  | 1.3  | 39    | 0.8  | 0.5  | 1.2  |
| ENDS + smokeless                            | 28    | 0.1  | 0.1  | 0.1  | 2     | 0.0  | 0.0  | 0.2  | 2     | 0.0  | 0.0  | 0.0  | 3     | 0.0  | 0.0  | 0.1  |
| Other combustibles + smokeless              | 96    | 0.3  | 0.3  | 0.4  | 7     | 0.1  | 0.0  | 0.2  | 7     | 0.1  | 0.0  | 0.1  | 15    | 0.3  | 0.1  | 0.7  |
| Poly use                                    | 483   | 1.4  | 1.3  | 1.5  | 78    | 1.2  | 0.9  | 1.6  | 123   | 1.2  | 0.9  | 1.4  | 63    | 1.3  | 0.9  | 1.8  |
| Cigarettes + ENDS + other combustibles      | 235   | 0.7  | 0.6  | 0.8  | 60    | 0.8  | 0.6  | 1.1  | 80    | 0.7  | 0.6  | 0.9  | 37    | 0.8  | 0.5  | 1.3  |
| Cigarettes + ENDS + smokeless               | 55    | 0.1  | 0.1  | 0.2  | 2     | 0.0  | 0.0  | 0.1  | 8     | 0.1  | 0.0  | 0.2  | 6     | 0.1  | 0.0  | 0.4  |
| Cigarettes + other combustibles + smokeless | 90    | 0.3  | 0.2  | 0.3  | 8     | 0.2  | 0.1  | 0.6  | 16    | 0.2  | 0.1  | 0.2  | 6     | 0.1  | 0.0  | 0.2  |
| ENDS + other combustibles + smokeless       | 28    | 0.1  | 0.0  | 0.1  | 2     | 0.0  | 0.0  | 0.1  | 7     | 0.1  | 0.0  | 0.1  | 3     | 0.0  | 0.0  | 0.1  |
| All four groups                             | 75    | 0.2  | 0.2  | 0.3  | 6     | 0.1  | 0.0  | 0.2  | 12    | 0.1  | 0.1  | 0.3  | 11    | 0.3  | 0.1  | 0.6  |

n = unweighted sample size; % = weighted percentage

ENDS = Electronic Nicotine Delivery Systems

**Supplemental Table 4b. Proportion of exclusive, dual, and polytobacco use among tobacco users by race/ethnicity: TUS-CPS (2014-2015), NHIS (2015), and PATH (2015-2016)**

|                                        | TUS-CPS (2014-2015)   |      |        |      |                      |      |        |      |                      |      |        |      |                      |      |        |      |
|----------------------------------------|-----------------------|------|--------|------|----------------------|------|--------|------|----------------------|------|--------|------|----------------------|------|--------|------|
|                                        | NH White (n = 21,425) |      |        |      | NH Black (n = 2,718) |      |        |      | Hispanic (n = 1,796) |      |        |      | NH Other (n = 1,549) |      |        |      |
|                                        | n                     | %    | 95% CI |      | n                    | %    | 95% CI |      | n                    | %    | 95% CI |      | n                    | %    | 95% CI |      |
|                                        |                       |      | LB     | UB   |                      |      | LB     | UB   |                      |      | LB     | UB   |                      |      | LB     | UB   |
| Exclusive use                          | 17,897                | 82.6 | 82.2   | 83.0 | 2,389                | 87.0 | 85.8   | 88.0 | 1,534                | 85.0 | 83.5   | 86.4 | 1299                 | 81.5 | 79.7   | 83.2 |
| Cigarettes                             | 13,405                | 60.8 | 60.2   | 61.3 | 2,014                | 70.8 | 69.2   | 72.4 | 1,280                | 69.3 | 67.3   | 71.1 | 1041                 | 65.7 | 63.2   | 68.0 |
| ENDS                                   | 833                   | 4.2  | 4.0    | 4.5  | 46                   | 1.9  | 1.5    | 2.5  | 72                   | 3.9  | 3.2    | 4.7  | 63                   | 4.1  | 3.3    | 5.0  |
| Other combustibles                     | 1,837                 | 9.3  | 9.0    | 9.7  | 257                  | 11.9 | 10.8   | 13.2 | 147                  | 9.8  | 8.7    | 11.1 | 111                  | 7.3  | 6.0    | 8.7  |
| Smokeless                              | 1,822                 | 8.3  | 8.0    | 8.6  | 72                   | 2.3  | 1.9    | 2.8  | 35                   | 2.0  | 1.5    | 2.7  | 84                   | 4.5  | 3.7    | 5.5  |
| Dual use                               | 3,177                 | 15.5 | 15.1   | 15.9 | 302                  | 12.0 | 10.9   | 13.1 | 233                  | 13.1 | 11.8   | 14.6 | 225                  | 16.1 | 14.5   | 17.9 |
| Cigarettes + ENDS                      | 1,813                 | 8.5  | 8.2    | 8.9  | 111                  | 3.9  | 3.3    | 4.5  | 100                  | 4.8  | 4.1    | 5.7  | 118                  | 9.4  | 8.2    | 10.8 |
| Cigarettes + other combustibles        | 756                   | 3.9  | 3.7    | 4.2  | 167                  | 7.0  | 6.1    | 8.0  | 103                  | 6.5  | 5.6    | 7.7  | 67                   | 4.4  | 3.5    | 5.5  |
| Cigarettes + smokeless                 | 333                   | 1.6  | 1.4    | 1.7  | 10                   | 0.3  | 0.2    | 0.5  | 9                    | 0.4  | 0.2    | 0.7  | 25                   | 1.1  | 0.8    | 1.5  |
| ENDS + other combustibles              | 84                    | 0.5  | 0.4    | 0.6  | 11                   | 0.6  | 0.4    | 0.9  | 18                   | 1.3  | 0.9    | 1.9  | 9                    | 0.9  | 0.5    | 1.6  |
| ENDS + smokeless                       | 37                    | 0.2  | 0.1    | 0.2  | 2                    | 0.1  | 0.1    | 0.4  | 0                    | 0.0  |        |      | 2                    | 0.1  | 0.0    | 0.4  |
| Other combustibles + smokeless         | 154                   | 0.8  | 0.7    | 1.0  | 1                    | 0.1  | 0.0    | 0.2  | 3                    | 0.1  | 0.1    | 0.3  | 4                    | 0.2  | 0.1    | 0.5  |
| Poly use                               | 351                   | 1.9  | 1.7    | 2.1  | 27                   | 1.1  | 0.8    | 1.4  | 29                   | 1.9  | 1.4    | 2.6  | 25                   | 2.4  | 1.7    | 3.3  |
| Cigarettes + ENDS + other combustibles | 177                   | 1.0  | 0.8    | 1.1  | 22                   | 0.9  | 0.6    | 1.2  | 20                   | 1.3  | 0.9    | 1.9  | 10                   | 0.8  | 0.5    | 1.2  |
| Cigarettes + ENDS + smokeless          | 63                    | 0.3  | 0.3    | 0.4  | 2                    | 0.1  | 0.0    | 0.2  | 3                    | 0.1  | 0.1    | 0.3  | 3                    | 0.3  | 0.1    | 1.0  |

|                                             |    |     |     |     |   |     |     |     |   |     |     |     |   |     |     |     |
|---------------------------------------------|----|-----|-----|-----|---|-----|-----|-----|---|-----|-----|-----|---|-----|-----|-----|
| Cigarettes + other combustibles + smokeless | 77 | 0.4 | 0.3 | 0.5 | 2 | 0.1 | 0.0 | 0.2 | 4 | 0.3 | 0.1 | 0.7 | 9 | 0.8 | 0.4 | 1.4 |
| ENDS + other combustibles + smokeless       | 4  | 0.0 | 0.0 | 0.0 | 1 | 0.1 | 0.0 | 0.2 | 1 | 0.0 | 0.0 | 0.1 | 0 | 0.0 |     |     |
| All four groups                             | 30 | 0.2 | 0.1 | 0.2 | 0 | 0.0 |     |     | 1 | 0.1 | 0.0 | 0.3 | 3 | 0.5 | 0.2 | 1.2 |

**Supplemental Table 4b. Proportion of exclusive, dual, and polytobacco use among tobacco users by race/ethnicity: TUS-CPS (2014-2015), NHIS (2015), and PATH (2015-2016) – CONTINUED**

|                                 | NHIS (2015)          |      |        |      |                    |      |        |      |                    |      |        |      |                    |      |        |      |
|---------------------------------|----------------------|------|--------|------|--------------------|------|--------|------|--------------------|------|--------|------|--------------------|------|--------|------|
|                                 | NH White (n = 4,517) |      |        |      | NH Black (n = 872) |      |        |      | Hispanic (n = 760) |      |        |      | NH Other (n = 426) |      |        |      |
|                                 | n                    | %    | 95% CI |      | n                  | %    | 95% CI |      | n                  | %    | 95% CI |      | n                  | %    | 95% CI |      |
|                                 |                      |      | LB     | UB   |                    |      | LB     | UB   |                    |      | LB     | UB   |                    |      | LB     | UB   |
| Exclusive use                   | 3,555                | 79.6 | 77.9   | 81.2 | 730                | 82.0 | 78.5   | 85.1 | 658                | 87.7 | 84.5   | 90.3 | 328                | 75.1 | 68.4   | 80.7 |
| Cigarettes                      | 2,543                | 53.8 | 51.5   | 56.1 | 584                | 61.4 | 57.1   | 65.5 | 521                | 65.2 | 60.5   | 69.7 | 249                | 54.3 | 47.6   | 60.9 |
| ENDS                            | 242                  | 6.6  | 5.7    | 7.7  | 22                 | 2.5  | 1.5    | 4.0  | 35                 | 7.3  | 4.9    | 10.7 | 18                 | 6.7  | 3.9    | 11.4 |
| Other combustibles              | 401                  | 10.5 | 9.2    | 12.0 | 101                | 15.9 | 12.6   | 19.9 | 85                 | 13.2 | 10.1   | 17.1 | 48                 | 11.4 | 7.9    | 16.2 |
| Smokeless                       | 369                  | 8.7  | 7.4    | 10.0 | 23                 | 2.3  | 1.5    | 3.4  | 17                 | 2.0  | 0.9    | 4.1  | 13                 | 2.6  | 1.3    | 4.8  |
| Dual use                        | 840                  | 17.6 | 16.1   | 19.1 | 132                | 17.3 | 14.2   | 20.8 | 90                 | 10.4 | 8.1    | 13.4 | 85                 | 19.5 | 14.3   | 26.1 |
| Cigarettes + ENDS               | 416                  | 8.4  | 7.4    | 9.7  | 42                 | 5.7  | 3.9    | 8.4  | 41                 | 5.3  | 3.8    | 7.4  | 44                 | 11.3 | 7.3    | 17.1 |
| Cigarettes + other combustibles | 240                  | 4.6  | 3.9    | 5.5  | 82                 | 10.6 | 8.3    | 13.5 | 38                 | 3.8  | 2.6    | 5.5  | 28                 | 6.9  | 4.2    | 11.1 |
| Cigarettes + smokeless          | 96                   | 2.3  | 1.7    | 3.1  | 3                  | 0.4  | 0.1    | 1.3  | 6                  | 0.3  | 0.1    | 1.0  | 5                  | 0.3  | 0.1    | 1.0  |
| ENDS + other combustibles       | 21                   | 0.6  | 0.4    | 1.0  | 1                  | 0.1  | 0.0    | 0.4  | 4                  | 0.7  | 0.2    | 2.0  | 5                  | 0.7  | 0.2    | 2.0  |

|                                             |     |     |     |     |    |     |     |     |    |     |     |     |    |     |     |      |
|---------------------------------------------|-----|-----|-----|-----|----|-----|-----|-----|----|-----|-----|-----|----|-----|-----|------|
| ENDS + smokeless                            | 10  | 0.2 | 0.1 | 0.5 | 0  | 0.0 | 0.0 | 0.0 | 0  | 0.0 | 0.0 | 0.0 | 2  | 0.2 | 0.1 | 0.9  |
| Other combustibles + smokeless              | 57  | 1.3 | 0.9 | 1.9 | 4  | 0.5 | 0.1 | 1.5 | 1  | 0.3 | 0.0 | 2.4 | 1  | 0.1 | 0.0 | 0.4  |
| Poly use                                    | 122 | 2.9 | 2.2 | 3.6 | 10 | 0.7 | 0.3 | 1.3 | 12 | 1.9 | 0.9 | 3.9 | 13 | 5.4 | 2.2 | 12.8 |
| Cigarettes + ENDS + other combustibles      | 62  | 1.3 | 0.9 | 1.9 | 7  | 0.6 | 0.3 | 1.2 | 10 | 1.8 | 0.8 | 3.8 | 10 | 5.0 | 1.9 | 12.5 |
| Cigarettes + ENDS + smokeless               | 20  | 0.4 | 0.2 | 0.8 | 0  | 0.0 | 0.0 | 0.0 | 0  | 0.0 | 0.0 | 0.0 | 0  | 0.0 | 0.0 | 0.0  |
| Cigarettes + other combustibles + smokeless | 29  | 0.7 | 0.4 | 1.2 | 3  | 0.1 | 0.0 | 0.5 | 1  | 0.1 | 0.0 | 0.6 | 1  | 0.0 | 0.0 | 0.0  |
| ENDS + other combustibles + smokeless       | 2   | 0.0 | 0.0 | 0.1 | 0  | 0.0 | 0.0 | 0.0 | 1  | 0.0 | 0.0 | 0.1 | 1  | 0.4 | 0.1 | 2.7  |
| All four groups                             | 9   | 0.3 | 0.1 | 0.8 | 0  | 0.0 | 0.0 | 0.0 | 0  | 0.0 | 0.0 | 0.0 | 1  | 0.0 | 0.0 | 0.1  |

**Supplemental Table 4b. Proportion of exclusive, dual, and polytobacco use among tobacco users by race/ethnicity: TUS-CPS (2014-2015), NHIS (2015), and PATH (2015-2016) – CONTINUED**

|               | PATH (2015-2016)     |      |        |      |                      |      |        |      |                      |      |        |      |                    |      |        |      |
|---------------|----------------------|------|--------|------|----------------------|------|--------|------|----------------------|------|--------|------|--------------------|------|--------|------|
|               | NH White (n = 7,784) |      |        |      | NH Black (n = 1,782) |      |        |      | Hispanic (n = 1,724) |      |        |      | NH Other (n = 885) |      |        |      |
|               | n                    | %    | 95% CI |      | n                    | %    | 95% CI |      | n                    | %    | 95% CI |      | n                  | %    | 95% CI |      |
|               |                      |      | LB     | UB   |                      |      | LB     | UB   |                      |      | LB     | UB   |                    |      | LB     | UB   |
| Exclusive use | 5,591                | 74.4 | 73.3   | 75.5 | 1,336                | 76.3 | 74.3   | 78.2 | 1,224                | 74.7 | 72.0   | 77.3 | 596                | 70.9 | 65.9   | 75.3 |
| Cigarettes    | 3,806                | 49.2 | 47.8   | 50.5 | 935                  | 54.0 | 51.0   | 56.9 | 820                  | 52.4 | 49.2   | 55.6 | 400                | 45.5 | 41.0   | 50.1 |
| ENDS          | 484                  | 6.0  | 5.3    | 6.8  | 69                   | 3.9  | 2.9    | 5.2  | 114                  | 5.8  | 4.8    | 7.1  | 56                 | 6.4  | 4.3    | 9.3  |

|                                             |       |      |      |      |     |      |      |      |     |      |      |      |     |      |      |      |
|---------------------------------------------|-------|------|------|------|-----|------|------|------|-----|------|------|------|-----|------|------|------|
| Other combustibles                          | 726   | 10.8 | 9.8  | 11.9 | 307 | 16.5 | 14.3 | 19.0 | 266 | 15.2 | 13.1 | 17.6 | 103 | 14.7 | 11.5 | 18.6 |
| Smokeless                                   | 575   | 8.4  | 7.5  | 9.5  | 25  | 1.9  | 1.1  | 3.3  | 24  | 1.4  | 0.9  | 2.1  | 37  | 4.2  | 2.7  | 6.6  |
| Dual use                                    | 1,710 | 20.5 | 19.4 | 21.5 | 368 | 19.8 | 18.0 | 21.7 | 377 | 19.4 | 17.2 | 21.9 | 226 | 22.6 | 18.9 | 26.8 |
| Cigarettes + ENDS                           | 688   | 8.5  | 7.8  | 9.3  | 61  | 3.4  | 2.7  | 4.4  | 87  | 4.9  | 3.7  | 6.5  | 62  | 6.3  | 4.5  | 8.7  |
| Cigarettes + other combustibles             | 554   | 6.5  | 5.9  | 7.2  | 229 | 12.4 | 10.7 | 14.2 | 155 | 8.3  | 6.8  | 10.0 | 91  | 9.1  | 7.0  | 11.8 |
| Cigarettes + smokeless                      | 196   | 2.4  | 2.1  | 2.8  | 4   | 0.3  | 0.1  | 1.0  | 15  | 0.8  | 0.5  | 1.3  | 16  | 1.8  | 1.1  | 2.9  |
| ENDS + other combustibles                   | 148   | 1.5  | 1.2  | 1.8  | 65  | 3.3  | 2.5  | 4.4  | 111 | 5.1  | 4.1  | 6.3  | 39  | 3.9  | 2.5  | 6.0  |
| ENDS + smokeless                            | 28    | 0.3  | 0.2  | 0.5  | 2   | 0.1  | 0.0  | 0.6  | 2   | 0.1  | 0.0  | 0.2  | 3   | 0.2  | 0.1  | 0.6  |
| Other combustibles + smokeless              | 96    | 1.2  | 0.9  | 1.5  | 7   | 0.3  | 0.1  | 0.8  | 7   | 0.3  | 0.2  | 0.5  | 15  | 1.4  | 0.6  | 3.4  |
| Poly use                                    | 483   | 5.1  | 4.7  | 5.6  | 78  | 3.9  | 2.9  | 5.2  | 123 | 5.9  | 4.8  | 7.2  | 63  | 6.5  | 4.6  | 9.1  |
| Cigarettes + ENDS + other combustibles      | 235   | 2.6  | 2.2  | 3.0  | 60  | 2.8  | 2.1  | 3.7  | 80  | 3.8  | 2.9  | 4.8  | 37  | 4.0  | 2.5  | 6.2  |
| Cigarettes + ENDS + smokeless               | 55    | 0.6  | 0.4  | 0.7  | 2   | 0.1  | 0.0  | 0.4  | 8   | 0.4  | 0.2  | 0.8  | 6   | 0.7  | 0.2  | 2.0  |
| Cigarettes + other combustibles + smokeless | 90    | 1.0  | 0.8  | 1.2  | 8   | 0.7  | 0.3  | 1.8  | 16  | 0.8  | 0.5  | 1.2  | 6   | 0.4  | 0.2  | 1.0  |
| ENDS + other combustibles + smokeless       | 28    | 0.2  | 0.2  | 0.4  | 2   | 0.1  | 0.0  | 0.3  | 7   | 0.3  | 0.1  | 0.6  | 3   | 0.1  | 0.0  | 0.3  |
| All four groups                             | 75    | 0.8  | 0.6  | 1.0  | 6   | 0.2  | 0.1  | 0.5  | 12  | 0.7  | 0.3  | 1.4  | 11  | 1.3  | 0.6  | 3.1  |

n = unweighted sample size; % = weighted percentage

ENDS = Electronic Nicotine Delivery Systems

**Supplemental Table 5a. Population prevalence of exclusive, dual, and polytobacco use by education level (ages 25 and over): TUS-CPS (2014-2015), NHIS (2015), and PATH (2015-2016)**



|                                        | TUS-CPS (2014-2015)       |      |        |      |                                 |      |        |      |                           |      |        |      |                               |      |        |      |
|----------------------------------------|---------------------------|------|--------|------|---------------------------------|------|--------|------|---------------------------|------|--------|------|-------------------------------|------|--------|------|
|                                        | <High school (n = 14,609) |      |        |      | High school or GED (n = 40,334) |      |        |      | Some college (n = 40,560) |      |        |      | College graduate (n = 49,081) |      |        |      |
|                                        | n                         | %    | 95% CI |      | n                               | %    | 95% CI |      | n                         | %    | 95% CI |      | n                             | %    | 95% CI |      |
|                                        |                           |      | LB     | UB   |                                 |      | LB     | UB   |                           |      | LB     | UB   |                               |      | LB     | UB   |
| Non-user                               | 10,915                    | 76.3 | 75.7   | 76.9 | 30,915                          | 77.1 | 76.7   | 77.4 | 32,424                    | 80.1 | 79.8   | 80.4 | 44,969                        | 91.7 | 91.6   | 91.9 |
| Exclusive use                          | 3,171                     | 20.2 | 19.7   | 20.7 | 8,021                           | 19.5 | 19.1   | 19.8 | 6,741                     | 16.4 | 16.1   | 16.8 | 3,578                         | 7.1  | 7.0    | 7.3  |
| Cigarettes                             | 2,770                     | 17.8 | 17.3   | 18.4 | 6,558                           | 16.0 | 15.7   | 16.3 | 5,238                     | 12.7 | 12.4   | 12.9 | 2,101                         | 4.1  | 4.0    | 4.3  |
| ENDS                                   | 71                        | 0.4  | 0.3    | 0.5  | 277                             | 0.7  | 0.6    | 0.8  | 362                       | 0.9  | 0.9    | 1.0  | 180                           | 0.4  | 0.3    | 0.4  |
| Other combustibles                     | 108                       | 0.7  | 0.6    | 0.8  | 457                             | 1.2  | 1.1    | 1.3  | 577                       | 1.6  | 1.5    | 1.7  | 952                           | 2.0  | 1.9    | 2.1  |
| Smokeless                              | 222                       | 1.3  | 1.1    | 1.4  | 729                             | 1.7  | 1.6    | 1.8  | 564                       | 1.3  | 1.2    | 1.3  | 345                           | 0.7  | 0.6    | 0.7  |
| Dual use                               | 477                       | 3.2  | 3.0    | 3.4  | 1,259                           | 3.1  | 3.0    | 3.2  | 1,271                     | 3.1  | 3.0    | 3.3  | 498                           | 1.0  | 1.0    | 1.1  |
| Cigarettes + ENDS                      | 229                       | 1.4  | 1.3    | 1.6  | 711                             | 1.7  | 1.6    | 1.8  | 780                       | 1.9  | 1.8    | 2.0  | 266                           | 0.6  | 0.5    | 0.6  |
| Cigarettes + other combustibles        | 180                       | 1.3  | 1.2    | 1.5  | 333                             | 0.9  | 0.8    | 0.9  | 311                       | 0.8  | 0.7    | 0.9  | 123                           | 0.3  | 0.2    | 0.3  |
| Cigarettes + smokeless                 | 50                        | 0.3  | 0.3    | 0.4  | 155                             | 0.3  | 0.3    | 0.4  | 88                        | 0.2  | 0.2    | 0.2  | 34                            | 0.1  | 0.0    | 0.1  |
| ENDS + other combustibles              | 6                         | 0.0  | 0.0    | 0.1  | 17                              | 0.1  | 0.0    | 0.1  | 26                        | 0.1  | 0.1    | 0.1  | 26                            | 0.1  | 0.0    | 0.1  |
| ENDS + smokeless                       | 3                         | 0.0  | 0.0    | 0.0  | 8                               | 0.0  | 0.0    | 0.0  | 16                        | 0.0  | 0.0    | 0.1  | 8                             | 0.0  | 0.0    | 0.0  |
| Other combustibles + smokeless         | 9                         | 0.0  | 0.0    | 0.1  | 35                              | 0.1  | 0.1    | 0.1  | 50                        | 0.1  | 0.1    | 0.2  | 41                            | 0.1  | 0.1    | 0.1  |
| Poly use                               | 46                        | 0.3  | 0.2    | 0.4  | 139                             | 0.3  | 0.3    | 0.4  | 124                       | 0.3  | 0.3    | 0.4  | 36                            | 0.1  | 0.1    | 0.1  |
| Cigarettes + ENDS + other combustibles | 24                        | 0.2  | 0.1    | 0.3  | 73                              | 0.2  | 0.1    | 0.2  | 69                        | 0.2  | 0.1    | 0.2  | 20                            | 0.1  | 0.0    | 0.1  |
| Cigarettes + ENDS + smokeless          | 10                        | 0.1  | 0.0    | 0.1  | 21                              | 0.0  | 0.0    | 0.1  | 22                        | 0.1  | 0.0    | 0.1  | 6                             | 0.0  | 0.0    | 0.0  |

|                                             |   |     |     |     |    |     |     |     |    |     |     |     |   |     |     |     |
|---------------------------------------------|---|-----|-----|-----|----|-----|-----|-----|----|-----|-----|-----|---|-----|-----|-----|
| Cigarettes + other combustibles + smokeless | 9 | 0.1 | 0.0 | 0.1 | 33 | 0.1 | 0.1 | 0.1 | 22 | 0.1 | 0.0 | 0.1 | 6 | 0.0 | 0.0 | 0.0 |
| ENDS + other combustibles + smokeless       | 1 | 0.0 | 0.0 | 0.0 | 1  | 0.0 | 0.0 | 0.0 | 0  | 0.0 |     |     | 2 | 0.0 | 0.0 | 0.0 |
| All four groups                             | 2 | 0.0 | 0.0 | 0.0 | 11 | 0.0 | 0.0 | 0.0 | 11 | 0.0 | 0.0 | 0.1 | 2 | 0.0 | 0.0 | 0.0 |

**Supplemental Table 5a. Population prevalence of exclusive, dual, and polytobacco use by education level (ages 25 and over): TUS-CPS (2014-2015), NHIS (2015), and PATH (2015-2016) – CONTINUED**

|                                 | NHIS (2015)              |      |        |      |                                |      |        |      |                          |      |        |      |                              |      |        |      |
|---------------------------------|--------------------------|------|--------|------|--------------------------------|------|--------|------|--------------------------|------|--------|------|------------------------------|------|--------|------|
|                                 | <High school (n = 4,045) |      |        |      | High school or GED (n = 7,098) |      |        |      | Some college (n = 8,573) |      |        |      | College graduate (n = 9,089) |      |        |      |
|                                 | n                        | %    | 95% CI |      | n                              | %    | 95% CI |      | n                        | %    | 95% CI |      | n                            | %    | 95% CI |      |
|                                 |                          |      | LB     | UB   |                                |      | LB     | UB   |                          |      | LB     | UB   |                              |      | LB     | UB   |
| Non-user                        | 3,013                    | 72.3 | 70.2   | 74.2 | 5,252                          | 73.9 | 72.3   | 75.4 | 6,509                    | 76.8 | 75.4   | 78.0 | 8,098                        | 89.3 | 88.4   | 90.2 |
| Exclusive use                   | 857                      | 22.4 | 20.6   | 24.5 | 1,472                          | 20.9 | 19.5   | 22.3 | 1,648                    | 18.6 | 17.5   | 19.8 | 814                          | 9.0  | 8.2    | 9.8  |
| Cigarettes                      | 739                      | 18.9 | 17.2   | 20.6 | 1,206                          | 16.4 | 15.2   | 17.7 | 1,223                    | 13.2 | 12.3   | 14.2 | 454                          | 4.6  | 4.1    | 5.2  |
| ENDS                            | 22                       | 0.7  | 0.4    | 1.2  | 59                             | 1.1  | 0.8    | 1.5  | 122                      | 1.7  | 1.3    | 2.1  | 63                           | 0.7  | 0.5    | 1.0  |
| Other combustibles              | 35                       | 0.8  | 0.5    | 1.3  | 88                             | 1.5  | 1.1    | 2.0  | 171                      | 2.2  | 1.8    | 2.7  | 232                          | 2.9  | 2.4    | 3.4  |
| Smokeless                       | 61                       | 2.1  | 1.4    | 3.0  | 119                            | 1.9  | 1.4    | 2.5  | 132                      | 1.5  | 1.1    | 2.0  | 65                           | 0.7  | 0.5    | 1.1  |
| Dual use                        | 156                      | 4.5  | 3.5    | 5.6  | 330                            | 4.7  | 4.1    | 5.4  | 376                      | 4.1  | 3.5    | 4.9  | 154                          | 1.4  | 1.1    | 1.7  |
| Cigarettes + ENDS               | 66                       | 1.8  | 1.3    | 2.6  | 155                            | 2.3  | 1.9    | 2.9  | 199                      | 2.2  | 1.8    | 2.7  | 70                           | 0.6  | 0.4    | 0.8  |
| Cigarettes + other combustibles | 70                       | 2.1  | 1.5    | 3.0  | 119                            | 1.7  | 1.3    | 2.1  | 117                      | 1.2  | 0.9    | 1.5  | 45                           | 0.3  | 0.2    | 0.5  |
| Cigarettes + smokeless          | 17                       | 0.4  | 0.2    | 0.9  | 33                             | 0.4  | 0.3    | 0.7  | 30                       | 0.4  | 0.2    | 0.6  | 11                           | 0.1  | 0.1    | 0.2  |

|                                             |    |     |     |     |    |     |     |     |    |     |     |     |    |     |     |     |
|---------------------------------------------|----|-----|-----|-----|----|-----|-----|-----|----|-----|-----|-----|----|-----|-----|-----|
| ENDS + other combustibles                   | 2  | 0.0 | 0.0 | 0.2 | 5  | 0.1 | 0.0 | 0.2 | 6  | 0.1 | 0.0 | 0.3 | 7  | 0.1 | 0.0 | 0.2 |
| ENDS + smokeless                            | 0  | 0.0 | 0.0 | 0.0 | 3  | 0.0 | 0.0 | 0.0 | 4  | 0.0 | 0.0 | 0.1 | 2  | 0.0 | 0.0 | 0.2 |
| Other combustibles + smokeless              | 1  | 0.0 | 0.0 | 0.1 | 15 | 0.2 | 0.1 | 0.4 | 20 | 0.2 | 0.1 | 0.5 | 19 | 0.3 | 0.1 | 0.5 |
| Poly use                                    | 19 | 0.8 | 0.4 | 1.5 | 44 | 0.5 | 0.3 | 0.8 | 40 | 0.5 | 0.3 | 0.7 | 23 | 0.3 | 0.2 | 0.4 |
| Cigarettes + ENDS + other combustibles      | 8  | 0.4 | 0.1 | 1.0 | 24 | 0.3 | 0.2 | 0.5 | 22 | 0.2 | 0.1 | 0.4 | 17 | 0.2 | 0.2 | 0.4 |
| Cigarettes + ENDS + smokeless               | 3  | 0.1 | 0.0 | 0.4 | 8  | 0.1 | 0.0 | 0.3 | 6  | 0.1 | 0.0 | 0.3 | 3  | 0.0 | 0.0 | 0.1 |
| Cigarettes + other combustibles + smokeless | 6  | 0.1 | 0.0 | 0.6 | 11 | 0.1 | 0.0 | 0.3 | 7  | 0.1 | 0.0 | 0.3 | 1  | 0.0 | 0.0 | 0.0 |
| ENDS + other combustibles + smokeless       | 0  | 0.0 | 0.0 | 0.0 | 0  | 0.0 | 0.0 | 0.0 | 2  | 0.0 | 0.0 | 0.1 | 0  | 0.0 | 0.0 | 0.0 |
| All four groups                             | 2  | 0.2 | 0.0 | 0.9 | 1  | 0.0 | 0.0 | 0.1 | 3  | 0.0 | 0.0 | 0.1 | 2  | 0.0 | 0.0 | 0.0 |

**Supplemental Table 5a. Population prevalence of exclusive, dual, and polytobacco use by education level (ages 25 and over): TUS-CPS (2014-2015), NHIS (2015), and PATH (2015-2016) – CONTINUED**

|               | PATH (2015-2016)         |      |        |      |                                |      |        |      |                          |      |        |      |                              |      |        |      |
|---------------|--------------------------|------|--------|------|--------------------------------|------|--------|------|--------------------------|------|--------|------|------------------------------|------|--------|------|
|               | <High school (n = 2,506) |      |        |      | High school or GED (n = 5,258) |      |        |      | Some college (n = 6,514) |      |        |      | College graduate (n = 5,274) |      |        |      |
|               | n                        | %    | 95% CI |      | n                              | %    | 95% CI |      | n                        | %    | 95% CI |      | n                            | %    | 95% CI |      |
|               |                          |      | LB     | UB   |                                |      | LB     | UB   |                          |      | LB     | UB   |                              |      | LB     | UB   |
| Non-user      | 984                      | 66.8 | 64.5   | 69.0 | 2,149                          | 68.6 | 67.2   | 70.0 | 3,213                    | 73.1 | 71.9   | 74.2 | 3,838                        | 87.0 | 86.1   | 87.8 |
| Exclusive use | 1,174                    | 25.9 | 24.0   | 28.0 | 2,358                          | 24.3 | 23.1   | 25.5 | 2,427                    | 20.0 | 19.1   | 21.0 | 1,128                        | 10.5 | 9.7    | 11.2 |

|                                             |       |      |      |      |       |      |      |      |       |      |      |      |     |     |     |     |
|---------------------------------------------|-------|------|------|------|-------|------|------|------|-------|------|------|------|-----|-----|-----|-----|
| Cigarettes                                  | 1,002 | 21.7 | 19.9 | 23.5 | 1,925 | 19.0 | 18.0 | 20.1 | 1,768 | 14.0 | 13.2 | 14.8 | 592 | 5.0 | 4.5 | 5.5 |
| ENDS                                        | 48    | 1.2  | 0.9  | 1.7  | 123   | 1.4  | 1.1  | 1.7  | 192   | 1.6  | 1.3  | 1.9  | 81  | 0.7 | 0.5 | 0.9 |
| Other combustibles                          | 36    | 0.9  | 0.6  | 1.3  | 132   | 1.6  | 1.3  | 2.0  | 294   | 2.8  | 2.5  | 3.3  | 361 | 3.9 | 3.3 | 4.4 |
| Smokeless                                   | 88    | 2.2  | 1.5  | 3.1  | 178   | 2.3  | 1.9  | 2.7  | 173   | 1.6  | 1.3  | 1.9  | 94  | 1.0 | 0.7 | 1.3 |
| Dual use                                    | 274   | 5.8  | 5.1  | 6.6  | 597   | 5.6  | 5.1  | 6.2  | 721   | 5.7  | 5.2  | 6.3  | 257 | 2.2 | 1.9 | 2.5 |
| Cigarettes + ENDS                           | 96    | 2.1  | 1.6  | 2.7  | 217   | 2.1  | 1.8  | 2.5  | 309   | 2.4  | 2.1  | 2.8  | 99  | 0.9 | 0.7 | 1.1 |
| Cigarettes + other combustibles             | 138   | 2.9  | 2.3  | 3.5  | 274   | 2.4  | 2.1  | 2.7  | 267   | 2.1  | 1.8  | 2.5  | 87  | 0.7 | 0.6 | 0.9 |
| Cigarettes + smokeless                      | 27    | 0.6  | 0.4  | 1.0  | 64    | 0.7  | 0.5  | 0.9  | 58    | 0.5  | 0.4  | 0.6  | 15  | 0.1 | 0.1 | 0.2 |
| ENDS + other combustibles                   | 9     | 0.2  | 0.1  | 0.4  | 22    | 0.2  | 0.1  | 0.3  | 53    | 0.5  | 0.3  | 0.7  | 25  | 0.2 | 0.1 | 0.4 |
| ENDS + smokeless                            | 1     | 0.0  | 0.0  | 0.3  | 1     | 0.0  | 0.0  | 0.1  | 8     | 0.1  | 0.0  | 0.2  | 6   | 0.1 | 0.0 | 0.1 |
| Other combustibles + smokeless              | 3     | 0.1  | 0.0  | 0.2  | 19    | 0.2  | 0.1  | 0.4  | 26    | 0.2  | 0.1  | 0.3  | 25  | 0.2 | 0.1 | 0.3 |
| Poly use                                    | 74    | 1.5  | 1.2  | 1.9  | 154   | 1.5  | 1.2  | 1.9  | 153   | 1.2  | 1.0  | 1.4  | 51  | 0.4 | 0.3 | 0.5 |
| Cigarettes + ENDS + other combustibles      | 43    | 0.9  | 0.6  | 1.2  | 79    | 0.7  | 0.5  | 0.9  | 100   | 0.7  | 0.6  | 0.9  | 29  | 0.2 | 0.1 | 0.3 |
| Cigarettes + ENDS + smokeless               | 4     | 0.1  | 0.0  | 0.2  | 23    | 0.2  | 0.2  | 0.3  | 8     | 0.1  | 0.0  | 0.1  | 3   | 0.0 | 0.0 | 0.1 |
| Cigarettes + other combustibles + smokeless | 17    | 0.4  | 0.2  | 0.5  | 26    | 0.3  | 0.2  | 0.4  | 26    | 0.2  | 0.1  | 0.3  | 11  | 0.1 | 0.0 | 0.1 |
| ENDS + other combustibles + smokeless       | 4     | 0.1  | 0.0  | 0.2  | 4     | 0.1  | 0.0  | 0.5  | 3     | 0.0  | 0.0  | 0.1  | 3   | 0.0 | 0.0 | 0.1 |
| All four groups                             | 6     | 0.1  | 0.0  | 0.3  | 22    | 0.2  | 0.1  | 0.3  | 16    | 0.1  | 0.1  | 0.2  | 5   | 0.0 | 0.0 | 0.1 |

n = unweighted sample size; % = weighted percentage

ENDS = Electronic Nicotine Delivery Systems

**Supplemental Table 5b. Proportion of exclusive, dual, and polytobacco use among tobacco users by education level (ages 25 and over): TUS-CPS (2014-2015), NHIS (2015), and PATH (2015-2016)**

|                                        | TUS-CPS (2014-2015)      |      |        |      |                                |      |        |      |                          |      |        |      |                              |      |        |      |
|----------------------------------------|--------------------------|------|--------|------|--------------------------------|------|--------|------|--------------------------|------|--------|------|------------------------------|------|--------|------|
|                                        | <High school (n = 3,694) |      |        |      | High school or GED (n = 9,419) |      |        |      | Some college (n = 8,136) |      |        |      | College graduate (n = 4,112) |      |        |      |
|                                        | n                        | %    | 95% CI |      | n                              | %    | 95% CI |      | n                        | %    | 95% CI |      | n                            | %    | 95% CI |      |
|                                        |                          |      | LB     | UB   |                                |      | LB     | UB   |                          |      | LB     | UB   |                              |      | LB     | UB   |
| Exclusive use                          | 3,171                    | 85.2 | 84.2   | 86.1 | 8,021                          | 85.0 | 84.4   | 85.6 | 6,741                    | 82.6 | 81.9   | 83.3 | 3,578                        | 86.6 | 85.7   | 87.4 |
| Cigarettes                             | 2,770                    | 75.2 | 74.0   | 76.4 | 6,558                          | 69.7 | 68.9   | 70.5 | 5,238                    | 63.7 | 62.8   | 64.5 | 2,101                        | 49.9 | 48.6   | 51.2 |
| ENDS                                   | 71                       | 1.8  | 1.5    | 2.2  | 277                            | 3.0  | 2.7    | 3.3  | 362                      | 4.8  | 4.4    | 5.2  | 180                          | 4.3  | 3.8    | 4.8  |
| Other combustibles                     | 108                      | 2.8  | 2.5    | 3.3  | 457                            | 5.1  | 4.8    | 5.5  | 577                      | 7.9  | 7.4    | 8.4  | 952                          | 24.2 | 23.1   | 25.4 |
| Smokeless                              | 222                      | 5.4  | 4.8    | 6.0  | 729                            | 7.2  | 6.8    | 7.7  | 564                      | 6.3  | 5.9    | 6.7  | 345                          | 8.2  | 7.5    | 9.0  |
| Dual use                               | 477                      | 13.5 | 12.6   | 14.4 | 1,259                          | 13.6 | 13.0   | 14.1 | 1,271                    | 15.7 | 15.0   | 16.4 | 498                          | 12.5 | 11.7   | 13.3 |
| Cigarettes + ENDS                      | 229                      | 6.0  | 5.4    | 6.7  | 711                            | 7.5  | 7.1    | 8.0  | 780                      | 9.4  | 8.9    | 10.0 | 266                          | 6.7  | 6.1    | 7.4  |
| Cigarettes + other combustibles        | 180                      | 5.7  | 5.1    | 6.4  | 333                            | 3.8  | 3.5    | 4.1  | 311                      | 4.1  | 3.7    | 4.5  | 123                          | 3.3  | 2.9    | 3.9  |
| Cigarettes + smokeless                 | 50                       | 1.4  | 1.1    | 1.7  | 155                            | 1.5  | 1.3    | 1.7  | 88                       | 0.9  | 0.8    | 1.1  | 34                           | 0.7  | 0.5    | 0.9  |
| ENDS + other combustibles              | 6                        | 0.2  | 0.1    | 0.3  | 17                             | 0.3  | 0.2    | 0.4  | 26                       | 0.4  | 0.3    | 0.5  | 26                           | 0.7  | 0.5    | 0.9  |
| ENDS + smokeless                       | 3                        | 0.1  | 0.0    | 0.2  | 8                              | 0.1  | 0.0    | 0.1  | 16                       | 0.2  | 0.1    | 0.3  | 8                            | 0.2  | 0.1    | 0.3  |
| Other combustibles + smokeless         | 9                        | 0.2  | 0.1    | 0.3  | 35                             | 0.4  | 0.3    | 0.5  | 50                       | 0.6  | 0.5    | 0.8  | 41                           | 0.9  | 0.7    | 1.1  |
| Poly use                               | 46                       | 1.3  | 1.1    | 1.7  | 139                            | 1.4  | 1.2    | 1.6  | 124                      | 1.7  | 1.5    | 2.0  | 36                           | 1.0  | 0.8    | 1.3  |
| Cigarettes + ENDS + other combustibles | 24                       | 0.8  | 0.6    | 1.1  | 73                             | 0.8  | 0.6    | 1.0  | 69                       | 0.9  | 0.7    | 1.1  | 20                           | 0.7  | 0.5    | 0.9  |
| Cigarettes + ENDS + smokeless          | 10                       | 0.3  | 0.2    | 0.4  | 21                             | 0.2  | 0.1    | 0.3  | 22                       | 0.3  | 0.2    | 0.4  | 6                            | 0.1  | 0.1    | 0.3  |

|                                             |   |     |     |     |    |     |     |     |    |     |     |     |   |     |     |     |
|---------------------------------------------|---|-----|-----|-----|----|-----|-----|-----|----|-----|-----|-----|---|-----|-----|-----|
| Cigarettes + other combustibles + smokeless | 9 | 0.3 | 0.2 | 0.4 | 33 | 0.3 | 0.2 | 0.4 | 22 | 0.3 | 0.2 | 0.5 | 6 | 0.1 | 0.0 | 0.2 |
| ENDS + other combustibles + smokeless       | 1 | 0.0 | 0.0 | 0.1 | 1  | 0.0 | 0.0 | 0.0 | 0  | 0.0 |     |     | 2 | 0.1 | 0.0 | 0.2 |
| All four groups                             | 2 | 0.0 | 0.0 | 0.1 | 11 | 0.1 | 0.1 | 0.2 | 11 | 0.2 | 0.1 | 0.3 | 2 | 0.0 | 0.0 | 0.2 |

**Supplemental Table 5b. Proportion of exclusive, dual, and polytobacco use among tobacco users by education level (ages 25 and over): TUS-CPS (2014-2015), NHIS (2015), and PATH (2015-2016) – CONTINUED**

|                                 | NHIS (2015)              |      |        |      |                                |      |        |      |                          |      |        |      |                            |      |        |      |
|---------------------------------|--------------------------|------|--------|------|--------------------------------|------|--------|------|--------------------------|------|--------|------|----------------------------|------|--------|------|
|                                 | <High school (n = 1,032) |      |        |      | High school or GED (n = 1,846) |      |        |      | Some college (n = 2,064) |      |        |      | College graduate (n = 991) |      |        |      |
|                                 | n                        | %    | 95% CI |      | n                              | %    | 95% CI |      | n                        | %    | 95% CI |      | n                          | %    | 95% CI |      |
|                                 |                          |      | LB     | UB   |                                |      | LB     | UB   |                          |      | LB     | UB   |                            |      | LB     | UB   |
| Exclusive use                   | 857                      | 81.0 | 76.7   | 84.6 | 1,472                          | 80.0 | 77.5   | 82.3 | 1,648                    | 80.1 | 77.2   | 82.8 | 814                        | 84.3 | 81.3   | 86.9 |
| Cigarettes                      | 739                      | 68.1 | 63.5   | 72.3 | 1,206                          | 62.9 | 59.6   | 66.0 | 1,223                    | 56.9 | 53.8   | 60.0 | 454                        | 43.3 | 39.0   | 47.6 |
| ENDS                            | 22                       | 2.5  | 1.5    | 4.2  | 59                             | 4.3  | 3.2    | 5.7  | 122                      | 7.3  | 5.9    | 9.0  | 63                         | 6.9  | 5.0    | 9.5  |
| Other combustibles              | 35                       | 2.9  | 1.8    | 4.6  | 88                             | 5.6  | 4.2    | 7.5  | 171                      | 9.5  | 7.8    | 11.5 | 232                        | 27.1 | 23.3   | 31.2 |
| Smokeless                       | 61                       | 7.4  | 5.1    | 10.7 | 119                            | 7.2  | 5.6    | 9.3  | 132                      | 6.4  | 4.9    | 8.4  | 65                         | 7.0  | 5.0    | 9.7  |
| Dual use                        | 156                      | 16.1 | 12.9   | 20.0 | 330                            | 18.0 | 15.8   | 20.5 | 376                      | 17.8 | 15.4   | 20.6 | 154                        | 13.1 | 10.7   | 15.9 |
| Cigarettes + ENDS               | 66                       | 6.6  | 4.7    | 9.2  | 155                            | 9.0  | 7.2    | 11.1 | 199                      | 9.5  | 7.9    | 11.4 | 70                         | 5.5  | 4.1    | 7.3  |
| Cigarettes + other combustibles | 70                       | 7.7  | 5.6    | 10.5 | 119                            | 6.3  | 5.0    | 8.0  | 117                      | 5.1  | 4.0    | 6.5  | 45                         | 3.2  | 2.2    | 4.6  |
| Cigarettes + smokeless          | 17                       | 1.6  | 0.7    | 3.3  | 33                             | 1.7  | 1.1    | 2.6  | 30                       | 1.6  | 0.9    | 2.8  | 11                         | 1.0  | 0.5    | 2.0  |
| ENDS + other combustibles       | 2                        | 0.2  | 0.0    | 0.7  | 5                              | 0.2  | 0.1    | 0.6  | 6                        | 0.4  | 0.1    | 1.4  | 7                          | 0.6  | 0.3    | 1.5  |
| ENDS + smokeless                | 0                        | 0.0  | 0.0    | 0.0  | 3                              | 0.0  | 0.0    | 0.2  | 4                        | 0.2  | 0.1    | 0.5  | 2                          | 0.4  | 0.1    | 1.4  |

|                                             |    |     |     |     |    |     |     |     |    |     |     |     |    |     |     |     |
|---------------------------------------------|----|-----|-----|-----|----|-----|-----|-----|----|-----|-----|-----|----|-----|-----|-----|
| Other combustibles + smokeless              | 1  | 0.0 | 0.0 | 0.2 | 15 | 0.8 | 0.4 | 1.6 | 20 | 1.0 | 0.5 | 2.0 | 19 | 2.5 | 1.3 | 4.8 |
| Poly use                                    | 19 | 2.9 | 1.5 | 5.6 | 44 | 2.0 | 1.3 | 3.0 | 40 | 2.1 | 1.4 | 3.1 | 23 | 2.6 | 1.7 | 3.9 |
| Cigarettes + ENDS + other combustibles      | 8  | 1.4 | 0.5 | 3.6 | 24 | 1.1 | 0.6 | 1.8 | 22 | 1.0 | 0.5 | 1.9 | 17 | 2.3 | 1.4 | 3.5 |
| Cigarettes + ENDS + smokeless               | 3  | 0.4 | 0.1 | 1.3 | 8  | 0.4 | 0.1 | 1.2 | 6  | 0.5 | 0.2 | 1.2 | 3  | 0.2 | 0.1 | 0.7 |
| Cigarettes + other combustibles + smokeless | 6  | 0.5 | 0.1 | 2.0 | 11 | 0.4 | 0.2 | 1.0 | 7  | 0.5 | 0.2 | 1.2 | 1  | 0.1 | 0.0 | 0.5 |
| ENDS + other combustibles + smokeless       | 0  | 0.0 | 0.0 | 0.0 | 0  | 0.0 | 0.0 | 0.0 | 2  | 0.1 | 0.0 | 0.2 | 0  | 0.0 | 0.0 | 0.0 |
| All four groups                             | 2  | 0.7 | 0.1 | 3.1 | 1  | 0.1 | 0.0 | 0.5 | 3  | 0.1 | 0.0 | 0.5 | 2  | 0.1 | 0.0 | 0.4 |

**Supplemental Table 5b. Proportion of exclusive, dual, and polytobacco use among tobacco users by education level (ages 25 and over): TUS-CPS (2014-2015), NHIS (2015), and PATH (2015-2016) – CONTINUED**

|                    | PATH (2015-2016)         |      |        |      |                                |      |        |      |                          |      |        |      |                              |      |        |      |
|--------------------|--------------------------|------|--------|------|--------------------------------|------|--------|------|--------------------------|------|--------|------|------------------------------|------|--------|------|
|                    | <High school (n = 1,522) |      |        |      | High school or GED (n = 3,109) |      |        |      | Some college (n = 3,301) |      |        |      | College graduate (n = 1,436) |      |        |      |
|                    | n                        | %    | 95% CI |      | n                              | %    | 95% CI |      | n                        | %    | 95% CI |      | n                            | %    | 95% CI |      |
|                    |                          |      | LB     | UB   |                                |      | LB     | UB   |                          |      | LB     | UB   |                              |      | LB     | UB   |
| Exclusive use      | 1,174                    | 78.1 | 75.8   | 80.2 | 2,358                          | 77.3 | 75.8   | 78.8 | 2,427                    | 74.4 | 72.6   | 76.1 | 1,128                        | 80.4 | 77.8   | 82.8 |
| Cigarettes         | 1,002                    | 65.2 | 62.3   | 68.0 | 1,925                          | 60.6 | 58.5   | 62.6 | 1,768                    | 51.9 | 49.8   | 54.0 | 592                          | 38.4 | 35.2   | 41.6 |
| ENDS               | 48                       | 3.6  | 2.6    | 5.1  | 123                            | 4.4  | 3.5    | 5.4  | 192                      | 5.9  | 4.9    | 7.1  | 81                           | 5.1  | 3.9    | 6.7  |
| Other combustibles | 36                       | 2.7  | 1.8    | 4.0  | 132                            | 5.2  | 4.3    | 6.2  | 294                      | 10.6 | 9.3    | 12.0 | 361                          | 29.6 | 26.1   | 33.3 |
| Smokeless          | 88                       | 6.5  | 4.7    | 9.0  | 178                            | 7.2  | 6.1    | 8.5  | 173                      | 6.0  | 4.9    | 7.2  | 94                           | 7.3  | 5.6    | 9.6  |
| Dual use           | 274                      | 17.5 | 15.5   | 19.6 | 597                            | 17.9 | 16.5   | 19.4 | 721                      | 21.3 | 19.8   | 23.0 | 257                          | 16.9 | 14.8   | 19.2 |
| Cigarettes + ENDS  | 96                       | 6.2  | 4.8    | 7.9  | 217                            | 6.7  | 5.7    | 7.8  | 309                      | 9.0  | 8.0    | 10.2 | 99                           | 6.7  | 5.5    | 8.2  |





|                                             |        |      |      |      |        |      |      |      |        |      |      |      |
|---------------------------------------------|--------|------|------|------|--------|------|------|------|--------|------|------|------|
| Non-user                                    | 59,280 | 78.6 | 78.4 | 78.8 | 39,958 | 85.0 | 84.7 | 85.2 | 28,341 | 89.5 | 89.2 | 89.7 |
| Exclusive use                               | 14,108 | 17.7 | 17.4 | 17.9 | 6,124  | 12.7 | 12.4 | 12.9 | 2,887  | 8.9  | 8.7  | 9.2  |
| Cigarettes                                  | 11,745 | 14.5 | 14.3 | 14.7 | 4,407  | 9.1  | 8.8  | 9.3  | 1,588  | 4.8  | 4.6  | 5.0  |
| ENDS                                        | 520    | 0.7  | 0.7  | 0.8  | 321    | 0.7  | 0.6  | 0.8  | 173    | 0.6  | 0.5  | 0.7  |
| Other combustibles                          | 921    | 1.4  | 1.3  | 1.4  | 706    | 1.6  | 1.5  | 1.7  | 725    | 2.4  | 2.3  | 2.6  |
| Smokeless                                   | 922    | 1.1  | 1.0  | 1.1  | 690    | 1.3  | 1.2  | 1.4  | 401    | 1.1  | 1.0  | 1.2  |
| Dual use                                    | 2,507  | 3.3  | 3.2  | 3.5  | 994    | 2.1  | 2.0  | 2.2  | 436    | 1.4  | 1.3  | 1.5  |
| Cigarettes + ENDS                           | 1,388  | 1.7  | 1.6  | 1.8  | 525    | 1.1  | 1.0  | 1.1  | 229    | 0.8  | 0.7  | 0.9  |
| Cigarettes + other combustibles             | 766    | 1.1  | 1.1  | 1.2  | 229    | 0.5  | 0.5  | 0.6  | 98     | 0.3  | 0.3  | 0.4  |
| Cigarettes + smokeless                      | 203    | 0.3  | 0.2  | 0.3  | 133    | 0.2  | 0.2  | 0.3  | 41     | 0.1  | 0.1  | 0.1  |
| ENDS + other combustibles                   | 71     | 0.1  | 0.1  | 0.2  | 35     | 0.1  | 0.1  | 0.1  | 16     | 0.0  | 0.0  | 0.1  |
| ENDS + smokeless                            | 18     | 0.0  | 0.0  | 0.0  | 12     | 0.0  | 0.0  | 0.0  | 11     | 0.0  | 0.0  | 0.1  |
| Other combustibles + smokeless              | 61     | 0.1  | 0.1  | 0.1  | 60     | 0.1  | 0.1  | 0.2  | 41     | 0.2  | 0.1  | 0.2  |
| Poly use                                    | 276    | 0.4  | 0.4  | 0.4  | 110    | 0.3  | 0.2  | 0.3  | 46     | 0.2  | 0.1  | 0.2  |
| Cigarettes + ENDS + other combustibles      | 158    | 0.2  | 0.2  | 0.3  | 53     | 0.1  | 0.1  | 0.2  | 18     | 0.1  | 0.0  | 0.1  |
| Cigarettes + ENDS + smokeless               | 42     | 0.1  | 0.0  | 0.1  | 20     | 0.1  | 0.0  | 0.1  | 9      | 0.0  | 0.0  | 0.1  |
| Cigarettes + other combustibles + smokeless | 53     | 0.1  | 0.1  | 0.1  | 25     | 0.1  | 0.0  | 0.1  | 14     | 0.1  | 0.0  | 0.1  |
| ENDS + other combustibles + smokeless       | 1      | 0.0  | 0.0  | 0.0  | 2      | 0.0  | 0.0  | 0.0  | 3      | 0.0  | 0.0  | 0.0  |
| All four groups                             | 22     | 0.0  | 0.0  | 0.0  | 10     | 0.0  | 0.0  | 0.1  | 2      | 0.0  | 0.0  | 0.0  |

**Supplemental Table 6a. Population prevalence of exclusive, dual, and polytobacco use by household income: TUS-CPS (2014-2015), NHIS (2015), and PATH (2015-2016) – CONTINUED**

|          | NHIS (2015)            |      |        |      |                               |      |        |      |                        |      |        |      |
|----------|------------------------|------|--------|------|-------------------------------|------|--------|------|------------------------|------|--------|------|
|          | <\$50,000 (n = 16,816) |      |        |      | \$50,000-\$99,999 (n = 8,745) |      |        |      | \$100,000+ (n = 6,119) |      |        |      |
|          | n                      | %    | 95% CI |      | n                             | %    | 95% CI |      | n                      | %    | 95% CI |      |
|          |                        |      | LB     | UB   |                               |      | LB     | UB   |                        |      | LB     | UB   |
| Non-user | 12,624                 | 74.4 | 73.5   | 75.4 | 7,153                         | 81.0 | 79.7   | 82.3 | 5,329                  | 86.5 | 85.4   | 87.7 |

|                                             |       |      |      |      |       |      |      |      |     |      |      |      |
|---------------------------------------------|-------|------|------|------|-------|------|------|------|-----|------|------|------|
| Exclusive use                               | 3,341 | 20.2 | 19.4 | 21.1 | 1,274 | 15.3 | 14.1 | 16.4 | 657 | 11.4 | 10.4 | 12.5 |
| Cigarettes                                  | 2,713 | 15.8 | 15.1 | 16.6 | 857   | 10.3 | 9.3  | 11.2 | 327 | 5.5  | 4.6  | 6.4  |
| ENDS                                        | 164   | 1.3  | 1.1  | 1.6  | 90    | 1.3  | 1.0  | 1.7  | 63  | 1.1  | 0.7  | 1.4  |
| Other combustibles                          | 278   | 1.8  | 1.5  | 2.1  | 184   | 2.2  | 1.7  | 2.6  | 173 | 3.4  | 2.8  | 4.0  |
| Smokeless                                   | 186   | 1.3  | 1.0  | 1.6  | 142   | 1.5  | 1.2  | 1.9  | 94  | 1.5  | 1.0  | 1.9  |
| Dual use                                    | 746   | 4.6  | 4.1  | 5.1  | 284   | 3.4  | 2.7  | 4.0  | 116 | 1.7  | 1.2  | 2.1  |
| Cigarettes + ENDS                           | 365   | 2.3  | 1.9  | 2.6  | 138   | 1.5  | 1.2  | 1.9  | 41  | 0.7  | 0.4  | 0.9  |
| Cigarettes + other combustibles             | 279   | 1.7  | 1.4  | 2.0  | 81    | 0.9  | 0.6  | 1.1  | 28  | 0.4  | 0.2  | 0.6  |
| Cigarettes + smokeless                      | 59    | 0.4  | 0.2  | 0.5  | 37    | 0.5  | 0.3  | 0.8  | 14  | 0.2  | 0.1  | 0.3  |
| ENDS + other combustibles                   | 16    | 0.1  | 0.0  | 0.2  | 9     | 0.2  | 0.0  | 0.3  | 6   | 0.1  | 0.0  | 0.2  |
| ENDS + smokeless                            | 2     | 0.0  | 0.0  | 0.0  | 6     | 0.1  | 0.0  | 0.1  | 4   | 0.1  | 0.0  | 0.1  |
| Other combustibles + smokeless              | 27    | 0.1  | 0.1  | 0.2  | 14    | 0.2  | 0.1  | 0.4  | 23  | 0.3  | 0.1  | 0.5  |
| Poly use                                    | 106   | 0.8  | 0.6  | 1.0  | 34    | 0.4  | 0.2  | 0.5  | 18  | 0.4  | 0.2  | 0.5  |
| Cigarettes + ENDS + other combustibles      | 60    | 0.4  | 0.3  | 0.6  | 20    | 0.2  | 0.1  | 0.3  | 9   | 0.2  | 0.1  | 0.3  |
| Cigarettes + ENDS + smokeless               | 13    | 0.1  | 0.0  | 0.1  | 3     | 0.0  | 0.0  | 0.1  | 4   | 0.1  | 0.0  | 0.2  |
| Cigarettes + other combustibles + smokeless | 23    | 0.2  | 0.1  | 0.3  | 7     | 0.1  | 0.0  | 0.2  | 4   | 0.0  | 0.0  | 0.1  |
| ENDS + other combustibles + smokeless       | 3     | 0.0  | 0.0  | 0.0  | 1     | 0.0  | 0.0  | 0.0  | 0   | 0.0  | 0.0  | 0.0  |
| All four groups                             | 6     | 0.1  | 0.0  | 0.1  | 3     | 0.1  | 0.0  | 0.1  | 1   | 0.0  | 0.0  | 0.0  |

**Supplemental Table 6a. Population prevalence of exclusive, dual, and polytobacco use by household income: TUS-CPS (2014-2015), NHIS (2015), and PATH (2015-2016) – CONTINUED**

|          | PATH (2015-2016)       |      |        |      |                               |      |        |      |                        |      |        |      |
|----------|------------------------|------|--------|------|-------------------------------|------|--------|------|------------------------|------|--------|------|
|          | <\$50,000 (n = 16,244) |      |        |      | \$50,000-\$99,999 (n = 5,861) |      |        |      | \$100,000+ (n = 3,910) |      |        |      |
|          | n                      | %    | 95% CI |      | n                             | %    | 95% CI |      | n                      | %    | 95% CI |      |
| LB       |                        |      | UB     | LB   |                               |      | UB     | LB   |                        |      | UB     |      |
| Non-user | 8,022                  | 67.5 | 66.5   | 68.5 | 3,601                         | 78.8 | 77.7   | 79.9 | 2,747                  | 84.1 | 82.8   | 85.2 |



|                                             |        |      |      |      |       |      |      |      |       |      |      |      |
|---------------------------------------------|--------|------|------|------|-------|------|------|------|-------|------|------|------|
| Exclusive use                               | 14,108 | 82.5 | 81.9 | 83.1 | 6,124 | 84.3 | 83.5 | 85.0 | 2,887 | 84.8 | 83.8 | 85.7 |
| Cigarettes                                  | 11,745 | 67.8 | 67.2 | 68.4 | 4,407 | 60.2 | 59.2 | 61.2 | 1,588 | 45.6 | 44.1 | 47.2 |
| ENDS                                        | 520    | 3.3  | 3.0  | 3.5  | 321   | 4.7  | 4.3  | 5.2  | 173   | 5.5  | 4.8  | 6.2  |
| Other combustibles                          | 921    | 6.4  | 6.0  | 6.7  | 706   | 10.5 | 9.9  | 11.1 | 725   | 23.1 | 21.9 | 24.5 |
| Smokeless                                   | 922    | 5.1  | 4.8  | 5.3  | 690   | 8.9  | 8.3  | 9.6  | 401   | 10.6 | 9.7  | 11.5 |
| Dual use                                    | 2,507  | 15.6 | 15.1 | 16.1 | 994   | 13.9 | 13.2 | 14.6 | 436   | 13.6 | 12.7 | 14.6 |
| Cigarettes + ENDS                           | 1,388  | 8.0  | 7.7  | 8.4  | 525   | 7.0  | 6.5  | 7.5  | 229   | 7.2  | 6.5  | 8.1  |
| Cigarettes + other combustibles             | 766    | 5.3  | 4.9  | 5.6  | 229   | 3.5  | 3.2  | 3.9  | 98    | 3.1  | 2.7  | 3.7  |
| Cigarettes + smokeless                      | 203    | 1.2  | 1.1  | 1.3  | 133   | 1.7  | 1.4  | 1.9  | 41    | 0.9  | 0.7  | 1.3  |
| ENDS + other combustibles                   | 71     | 0.6  | 0.5  | 0.7  | 35    | 0.7  | 0.6  | 0.9  | 16    | 0.5  | 0.3  | 0.8  |
| ENDS + smokeless                            | 18     | 0.1  | 0.1  | 0.2  | 12    | 0.2  | 0.1  | 0.3  | 11    | 0.4  | 0.2  | 0.6  |
| Other combustibles + smokeless              | 61     | 0.4  | 0.3  | 0.5  | 60    | 0.8  | 0.7  | 1.0  | 41    | 1.5  | 1.1  | 2.0  |
| Poly use                                    | 276    | 1.9  | 1.7  | 2.1  | 110   | 1.8  | 1.6  | 2.1  | 46    | 1.6  | 1.2  | 1.9  |
| Cigarettes + ENDS + other combustibles      | 158    | 1.1  | 0.9  | 1.2  | 53    | 0.9  | 0.7  | 1.2  | 18    | 0.6  | 0.4  | 0.9  |
| Cigarettes + ENDS + smokeless               | 42     | 0.3  | 0.2  | 0.3  | 20    | 0.3  | 0.2  | 0.5  | 9     | 0.3  | 0.2  | 0.5  |
| Cigarettes + other combustibles + smokeless | 53     | 0.4  | 0.3  | 0.5  | 25    | 0.4  | 0.2  | 0.5  | 14    | 0.5  | 0.3  | 0.8  |
| ENDS + other combustibles + smokeless       | 1      | 0.0  | 0.0  | 0.0  | 2     | 0.0  | 0.0  | 0.0  | 3     | 0.1  | 0.0  | 0.2  |
| All four groups                             | 22     | 0.1  | 0.1  | 0.2  | 10    | 0.2  | 0.1  | 0.4  | 2     | 0.0  | 0.0  | 0.1  |

**Supplemental Table 6b. Proportion of exclusive, dual, and polytobacco use among tobacco users by household income: TUS-CPS (2014-2015), NHIS (2015), and PATH (2015-2016) – CONTINUED**

|               | NHIS (2015)           |      |        |      |                               |      |        |      |                      |      |        |      |
|---------------|-----------------------|------|--------|------|-------------------------------|------|--------|------|----------------------|------|--------|------|
|               | <\$50,000 (n = 4,194) |      |        |      | \$50,000-\$99,999 (n = 1,592) |      |        |      | \$100,000+ (n = 791) |      |        |      |
|               | n                     | %    | 95% CI |      | n                             | %    | 95% CI |      | n                    | %    | 95% CI |      |
|               |                       |      | LB     | UB   |                               |      | LB     | UB   |                      |      | LB     | UB   |
| Exclusive use | 3,341                 | 79.1 | 77.3   | 80.9 | 1,274                         | 80.4 | 77.4   | 83.3 | 657                  | 84.9 | 81.4   | 88.3 |
| Cigarettes    | 2,713                 | 61.9 | 59.6   | 64.1 | 857                           | 53.9 | 50.3   | 57.6 | 327                  | 40.7 | 35.3   | 46.0 |

|                                             |     |      |      |      |     |      |      |      |     |      |      |      |
|---------------------------------------------|-----|------|------|------|-----|------|------|------|-----|------|------|------|
| ENDS                                        | 164 | 5.2  | 4.2  | 6.2  | 90  | 7.0  | 5.3  | 8.7  | 63  | 7.9  | 5.5  | 10.4 |
| Other combustibles                          | 278 | 7.0  | 5.9  | 8.0  | 184 | 11.3 | 9.1  | 13.6 | 173 | 25.3 | 21.0 | 29.6 |
| Smokeless                                   | 186 | 5.0  | 3.9  | 6.1  | 142 | 8.0  | 6.1  | 9.9  | 94  | 11.0 | 7.8  | 14.2 |
| Dual use                                    | 746 | 17.9 | 16.3 | 19.6 | 284 | 17.7 | 14.9 | 20.6 | 116 | 12.5 | 9.3  | 15.6 |
| Cigarettes + ENDS                           | 365 | 8.9  | 7.7  | 10.1 | 138 | 8.1  | 6.3  | 9.9  | 41  | 4.9  | 3.0  | 6.8  |
| Cigarettes + other combustibles             | 279 | 6.6  | 5.6  | 7.6  | 81  | 4.5  | 3.3  | 5.7  | 28  | 2.9  | 1.2  | 4.6  |
| Cigarettes + smokeless                      | 59  | 1.4  | 0.9  | 2.0  | 37  | 2.8  | 1.5  | 4.1  | 14  | 1.4  | 0.4  | 2.3  |
| ENDS + other combustibles                   | 16  | 0.4  | 0.2  | 0.7  | 9   | 0.9  | 0.1  | 1.6  | 6   | 0.6  | 0.0  | 1.2  |
| ENDS + smokeless                            | 2   | 0.0  | 0.0  | 0.1  | 6   | 0.3  | 0.0  | 0.6  | 4   | 0.5  | 0.0  | 1.1  |
| Other combustibles + smokeless              | 27  | 0.5  | 0.2  | 0.8  | 14  | 1.2  | 0.3  | 2.0  | 23  | 2.3  | 0.9  | 3.7  |
| Poly use                                    | 106 | 3.0  | 2.2  | 3.8  | 34  | 1.9  | 1.0  | 2.8  | 18  | 2.7  | 1.5  | 3.8  |
| Cigarettes + ENDS + other combustibles      | 60  | 1.7  | 1.1  | 2.4  | 20  | 0.9  | 0.3  | 1.5  | 9   | 1.5  | 0.7  | 2.4  |
| Cigarettes + ENDS + smokeless               | 13  | 0.3  | 0.0  | 0.5  | 3   | 0.1  | 0.0  | 0.3  | 4   | 0.7  | 0.0  | 1.5  |
| Cigarettes + other combustibles + smokeless | 23  | 0.7  | 0.2  | 1.1  | 7   | 0.6  | 0.0  | 1.1  | 4   | 0.3  | 0.0  | 0.6  |
| ENDS + other combustibles + smokeless       | 3   | 0.1  | 0.0  | 0.1  | 1   | 0.0  | 0.0  | 0.1  | 0   | 0.0  | 0.0  | 0.0  |
| All four groups                             | 6   | 0.2  | 0.0  | 0.5  | 3   | 0.3  | 0.0  | 0.7  | 1   | 0.2  | 0.0  | 0.5  |

**Supplemental Table 6b. Proportion of exclusive, dual, and polytobacco use among tobacco users by household income: TUS-CPS (2014-2015), NHIS (2015), and PATH (2015-2016) – CONTINUED**

|                    | PATH (2015-2016)      |      |        |      |                               |      |        |      |                        |      |        |      |
|--------------------|-----------------------|------|--------|------|-------------------------------|------|--------|------|------------------------|------|--------|------|
|                    | <\$50,000 (n = 8,222) |      |        |      | \$50,000-\$99,999 (n = 2,260) |      |        |      | \$100,000+ (n = 1,163) |      |        |      |
|                    | n                     | %    | 95% CI |      | n                             | %    | 95% CI |      | n                      | %    | 95% CI |      |
|                    |                       |      | LB     | UB   |                               |      | LB     | UB   |                        |      | LB     | UB   |
| Exclusive use      | 5,804                 | 73.0 | 72.0   | 73.9 | 1,720                         | 78.0 | 75.9   | 79.9 | 862                    | 78.0 | 75.1   | 80.6 |
| Cigarettes         | 4,336                 | 54.9 | 53.6   | 56.3 | 1,046                         | 46.7 | 44.4   | 49.0 | 360                    | 31.1 | 28.0   | 34.2 |
| ENDS               | 420                   | 5.0  | 4.4    | 5.6  | 163                           | 7.1  | 5.9    | 8.5  | 83                     | 6.6  | 4.9    | 8.7  |
| Other combustibles | 703                   | 8.1  | 7.4    | 9.0  | 336                           | 15.1 | 13.3   | 17.1 | 303                    | 30.4 | 26.6   | 34.4 |

|                                             |       |      |      |      |     |      |      |      |     |      |      |      |
|---------------------------------------------|-------|------|------|------|-----|------|------|------|-----|------|------|------|
| Smokeless                                   | 345   | 4.9  | 4.3  | 5.6  | 175 | 9.1  | 7.6  | 10.9 | 116 | 10.0 | 8.2  | 12.2 |
| Dual use                                    | 1,877 | 21.3 | 20.4 | 22.3 | 438 | 18.3 | 16.6 | 20.1 | 244 | 18.7 | 16.3 | 21.5 |
| Cigarettes + ENDS                           | 630   | 7.6  | 6.9  | 8.4  | 160 | 7.1  | 6.0  | 8.4  | 74  | 6.0  | 4.6  | 7.9  |
| Cigarettes + other combustibles             | 785   | 8.8  | 8.1  | 9.4  | 136 | 5.8  | 4.8  | 7.0  | 58  | 4.4  | 3.3  | 5.9  |
| Cigarettes + smokeless                      | 157   | 1.9  | 1.6  | 2.3  | 50  | 2.3  | 1.6  | 3.2  | 20  | 1.7  | 1.0  | 2.9  |
| ENDS + other combustibles                   | 228   | 2.1  | 1.8  | 2.5  | 63  | 2.0  | 1.5  | 2.6  | 46  | 3.4  | 2.4  | 4.8  |
| ENDS + smokeless                            | 20    | 0.2  | 0.1  | 0.4  | 6   | 0.2  | 0.1  | 0.5  | 9   | 0.6  | 0.3  | 1.3  |
| Other combustibles + smokeless              | 57    | 0.6  | 0.5  | 0.9  | 23  | 0.9  | 0.6  | 1.5  | 37  | 2.6  | 1.9  | 3.5  |
| Poly use                                    | 541   | 5.7  | 5.2  | 6.3  | 102 | 3.7  | 3.0  | 4.7  | 57  | 3.3  | 2.4  | 4.4  |
| Cigarettes + ENDS + other combustibles      | 326   | 3.5  | 3.1  | 4.0  | 44  | 1.6  | 1.1  | 2.2  | 17  | 0.9  | 0.6  | 1.5  |
| Cigarettes + ENDS + smokeless               | 51    | 0.6  | 0.4  | 0.7  | 12  | 0.4  | 0.2  | 0.8  | 6   | 0.3  | 0.1  | 0.7  |
| Cigarettes + other combustibles + smokeless | 61    | 0.7  | 0.5  | 0.8  | 31  | 1.2  | 0.8  | 1.7  | 15  | 1.0  | 0.5  | 2.1  |
| ENDS + other combustibles + smokeless       | 24    | 0.2  | 0.1  | 0.3  | 1   | 0.1  | 0.0  | 0.6  | 14  | 0.6  | 0.4  | 1.1  |
| All four groups                             | 79    | 0.8  | 0.6  | 1.0  | 14  | 0.5  | 0.3  | 0.9  | 5   | 0.4  | 0.1  | 1.4  |

n = unweighted sample size; % = weighted percentage

ENDS = Electronic Nicotine Delivery Systems

**Supplemental Table 7a. Population prevalence of exclusive, dual, and polytobacco use by age: TUS-CPS (2014-2015), NHIS (2015), and PATH (2015-2016)**

|               | TUS-CPS (2014-2015) |      |        |      |                    |      |        |      |                    |      |        |      |                  |      |        |      |
|---------------|---------------------|------|--------|------|--------------------|------|--------|------|--------------------|------|--------|------|------------------|------|--------|------|
|               | 18-24 (n = 10,483)  |      |        |      | 25-34 (n = 25,359) |      |        |      | 35-54 (n = 53,464) |      |        |      | 55+ (n = 65,761) |      |        |      |
|               | n                   | %    | 95% CI |      | n                  | %    | 95% CI |      | n                  | %    | 95% CI |      | n                | %    | 95% CI |      |
|               |                     |      | LB     | UB   |                    |      | LB     | UB   |                    |      | LB     | UB   |                  |      | LB     | UB   |
| Non-user      | 8,356               | 81.5 | 80.9   | 82.1 | 19,809             | 79.5 | 79.1   | 79.9 | 42,574             | 80.9 | 80.6   | 81.1 | 56,840           | 86.6 | 86.4   | 86.9 |
| Exclusive use | 1,608               | 14.0 | 13.4   | 14.6 | 4,520              | 16.6 | 16.2   | 17.0 | 9,171              | 16.1 | 15.9   | 16.4 | 7,820            | 11.7 | 11.5   | 11.9 |
| Cigarettes    | 1,073               | 9.1  | 8.6    | 9.6  | 3,360              | 12.2 | 11.9   | 12.6 | 7,144              | 12.5 | 12.3   | 12.8 | 6,163            | 9.3  | 9.1    | 9.4  |
| ENDS          | 124                 | 1.1  | 1.0    | 1.3  | 236                | 0.9  | 0.8    | 1.0  | 396                | 0.7  | 0.7    | 0.8  | 258              | 0.4  | 0.3    | 0.4  |

|                                             |     |     |     |     |     |     |     |     |       |     |     |     |       |     |     |     |
|---------------------------------------------|-----|-----|-----|-----|-----|-----|-----|-----|-------|-----|-----|-----|-------|-----|-----|-----|
| Other combustibles                          | 258 | 2.6 | 2.3 | 2.8 | 551 | 2.2 | 2.0 | 2.3 | 714   | 1.4 | 1.3 | 1.4 | 829   | 1.3 | 1.3 | 1.4 |
| Smokeless                                   | 153 | 1.2 | 1.0 | 1.3 | 373 | 1.3 | 1.2 | 1.4 | 917   | 1.5 | 1.5 | 1.6 | 570   | 0.8 | 0.7 | 0.8 |
| Dual use                                    | 432 | 3.8 | 3.5 | 4.0 | 902 | 3.4 | 3.3 | 3.6 | 1,571 | 2.7 | 2.6 | 2.9 | 1,032 | 1.5 | 1.5 | 1.6 |
| Cigarettes + ENDS                           | 156 | 1.3 | 1.1 | 1.5 | 451 | 1.7 | 1.6 | 1.8 | 907   | 1.6 | 1.5 | 1.7 | 628   | 0.9 | 0.9 | 1.0 |
| Cigarettes + other combustibles             | 146 | 1.4 | 1.2 | 1.6 | 229 | 1.1 | 0.9 | 1.2 | 416   | 0.8 | 0.7 | 0.8 | 302   | 0.5 | 0.4 | 0.5 |
| Cigarettes + smokeless                      | 50  | 0.4 | 0.3 | 0.5 | 122 | 0.4 | 0.3 | 0.4 | 161   | 0.2 | 0.2 | 0.3 | 44    | 0.1 | 0.1 | 0.1 |
| ENDS + other combustibles                   | 47  | 0.4 | 0.3 | 0.5 | 41  | 0.2 | 0.1 | 0.2 | 21    | 0.0 | 0.0 | 0.1 | 13    | 0.0 | 0.0 | 0.0 |
| ENDS + smokeless                            | 6   | 0.0 | 0.0 | 0.1 | 15  | 0.1 | 0.0 | 0.1 | 16    | 0.0 | 0.0 | 0.0 | 4     | 0.0 | 0.0 | 0.0 |
| Other combustibles + smokeless              | 27  | 0.3 | 0.2 | 0.4 | 44  | 0.1 | 0.1 | 0.2 | 50    | 0.1 | 0.1 | 0.1 | 41    | 0.1 | 0.0 | 0.1 |
| Poly use                                    | 87  | 0.8 | 0.7 | 0.9 | 128 | 0.5 | 0.4 | 0.6 | 148   | 0.3 | 0.2 | 0.3 | 69    | 0.1 | 0.1 | 0.1 |
| Cigarettes + ENDS + other combustibles      | 43  | 0.4 | 0.3 | 0.5 | 61  | 0.3 | 0.2 | 0.3 | 84    | 0.1 | 0.1 | 0.2 | 41    | 0.1 | 0.1 | 0.1 |
| Cigarettes + ENDS + smokeless               | 12  | 0.1 | 0.1 | 0.2 | 28  | 0.1 | 0.1 | 0.1 | 22    | 0.0 | 0.0 | 0.1 | 9     | 0.0 | 0.0 | 0.0 |
| Cigarettes + other combustibles + smokeless | 22  | 0.2 | 0.1 | 0.3 | 26  | 0.1 | 0.1 | 0.1 | 30    | 0.1 | 0.0 | 0.1 | 14    | 0.0 | 0.0 | 0.0 |
| ENDS + other combustibles + smokeless       | 2   | 0.0 | 0.0 | 0.0 | 1   | 0.0 | 0.0 | 0.0 | 1     | 0.0 | 0.0 | 0.0 | 2     | 0.0 | 0.0 | 0.0 |
| All four groups                             | 8   | 0.1 | 0.1 | 0.2 | 12  | 0.0 | 0.0 | 0.1 | 11    | 0.0 | 0.0 | 0.0 | 3     | 0.0 | 0.0 | 0.0 |

**Supplemental Table 7a. Population prevalence of exclusive, dual, and polytobacco use by age: TUS-CPS (2014-2015), NHIS (2015), and PATH (2015-2016) – CONTINUED**

|  |             |
|--|-------------|
|  | NHIS (2015) |
|--|-------------|

|                                             | 18-24 (n = 2,747) |      |        |      | 25-34 (n = 5,409) |      |        |      | 35-54 (n = 10,137) |      |        |      | 55+ (n = 13,387) |      |        |      |
|---------------------------------------------|-------------------|------|--------|------|-------------------|------|--------|------|--------------------|------|--------|------|------------------|------|--------|------|
|                                             | n                 | %    | 95% CI |      | n                 | %    | 95% CI |      | n                  | %    | 95% CI |      | n                | %    | 95% CI |      |
|                                             |                   |      | LB     | UB   |                   |      | LB     | UB   |                    |      | LB     | UB   |                  |      | LB     | UB   |
| Non-user                                    | 2,130             | 78.5 | 76.3   | 80.6 | 4,060             | 75.6 | 73.9   | 77.2 | 7,620              | 76.6 | 75.4   | 77.8 | 11,295           | 84.9 | 84.1   | 85.8 |
| Exclusive use                               | 456               | 16.4 | 14.6   | 18.4 | 1,053             | 19.3 | 17.9   | 20.7 | 2,005              | 18.7 | 17.6   | 19.8 | 1,757            | 12.7 | 12.0   | 13.6 |
| Cigarettes                                  | 252               | 8.4  | 7.1    | 10.0 | 743               | 13.1 | 12.1   | 14.3 | 1,522              | 13.5 | 12.6   | 14.5 | 1,380            | 9.4  | 8.8    | 10.1 |
| ENDS                                        | 51                | 2.4  | 1.7    | 3.3  | 80                | 1.6  | 1.2    | 2.0  | 108                | 1.4  | 1.1    | 1.7  | 78               | 0.6  | 0.5    | 0.9  |
| Other combustibles                          | 109               | 4.1  | 3.2    | 5.2  | 144               | 3.0  | 2.4    | 3.8  | 191                | 2.1  | 1.7    | 2.5  | 191              | 1.6  | 1.4    | 2.0  |
| Smokeless                                   | 44                | 1.5  | 1.0    | 2.3  | 86                | 1.5  | 1.1    | 2.1  | 184                | 1.7  | 1.4    | 2.1  | 108              | 1.0  | 0.8    | 1.4  |
| Dual use                                    | 130               | 4.0  | 3.1    | 5.1  | 246               | 4.1  | 3.4    | 4.9  | 461                | 4.3  | 3.8    | 4.8  | 310              | 2.2  | 1.8    | 2.5  |
| Cigarettes + ENDS                           | 53                | 1.5  | 1.1    | 2.1  | 95                | 1.5  | 1.1    | 2.0  | 240                | 2.3  | 1.9    | 2.7  | 155              | 1.1  | 0.9    | 1.4  |
| Cigarettes + other combustibles             | 36                | 0.9  | 0.5    | 1.4  | 93                | 1.6  | 1.2    | 2.1  | 136                | 1.2  | 1.0    | 1.6  | 123              | 0.8  | 0.6    | 1.0  |
| Cigarettes + smokeless                      | 19                | 0.8  | 0.4    | 1.7  | 32                | 0.6  | 0.3    | 1.0  | 41                 | 0.3  | 0.2    | 0.5  | 18               | 0.2  | 0.1    | 0.3  |
| ENDS + other combustibles                   | 11                | 0.5  | 0.2    | 0.9  | 11                | 0.2  | 0.1    | 0.5  | 6                  | 0.0  | 0.0    | 0.1  | 3                | 0.0  | 0.0    | 0.1  |
| ENDS + smokeless                            | 3                 | 0.1  | 0.0    | 0.6  | 3                 | 0.1  | 0.0    | 0.2  | 4                  | 0.0  | 0.0    | 0.1  | 2                | 0.0  | 0.0    | 0.0  |
| Other combustibles + smokeless              | 8                 | 0.2  | 0.1    | 0.5  | 12                | 0.2  | 0.1    | 0.3  | 34                 | 0.4  | 0.2    | 0.6  | 9                | 0.1  | 0.0    | 0.2  |
| Poly use                                    | 31                | 1.1  | 0.7    | 1.7  | 50                | 1.0  | 0.7    | 1.6  | 51                 | 0.5  | 0.3    | 0.6  | 25               | 0.2  | 0.1    | 0.3  |
| Cigarettes + ENDS + other combustibles      | 18                | 0.5  | 0.3    | 1.0  | 29                | 0.6  | 0.4    | 1.1  | 29                 | 0.2  | 0.2    | 0.4  | 13               | 0.1  | 0.0    | 0.2  |
| Cigarettes + ENDS + smokeless               | 0                 | 0.0  | 0.0    | 0.0  | 7                 | 0.2  | 0.1    | 0.4  | 9                  | 0.1  | 0.0    | 0.2  | 4                | 0.0  | 0.0    | 0.1  |
| Cigarettes + other combustibles + smokeless | 9                 | 0.4  | 0.1    | 0.9  | 8                 | 0.1  | 0.0    | 0.3  | 10                 | 0.1  | 0.0    | 0.2  | 7                | 0.0  | 0.0    | 0.1  |



|                                       |   |     |     |     |   |     |     |     |   |     |     |     |   |     |     |     |
|---------------------------------------|---|-----|-----|-----|---|-----|-----|-----|---|-----|-----|-----|---|-----|-----|-----|
| ENDS + other combustibles + smokeless | 2 | 0.0 | 0.0 | 0.2 | 2 | 0.0 | 0.0 | 0.1 | 0 | 0.0 | 0.0 | 0.0 | 0 | 0.0 | 0.0 | 0.0 |
| All four groups                       | 2 | 0.1 | 0.0 | 0.6 | 4 | 0.1 | 0.0 | 0.5 | 3 | 0.0 | 0.0 | 0.1 | 1 | 0.0 | 0.0 | 0.1 |

**Supplemental Table 7a. Population prevalence of exclusive, dual, and polytobacco use by age: TUS-CPS (2014-2015), NHIS (2015), and PATH (2015-2016) – CONTINUED**

|                                 | PATH (2015-2016)  |      |        |      |                   |      |        |      |                   |      |        |      |                 |      |        |      |
|---------------------------------|-------------------|------|--------|------|-------------------|------|--------|------|-------------------|------|--------|------|-----------------|------|--------|------|
|                                 | 18-24 (n = 8,435) |      |        |      | 25-34 (n = 5,813) |      |        |      | 35-54 (n = 7,748) |      |        |      | 55+ (n = 6,072) |      |        |      |
|                                 | n                 | %    | 95% CI |      | n                 | %    | 95% CI |      | n                 | %    | 95% CI |      | n               | %    | 95% CI |      |
|                                 |                   |      | LB     | UB   |                   |      | LB     | UB   |                   |      | LB     | UB   |                 |      | LB     | UB   |
| Non-user                        | 5,478             | 68.5 | 67.0   | 69.9 | 2,960             | 66.5 | 64.8   | 68.1 | 3,737             | 72.2 | 71.0   | 73.3 | 3,516           | 82.7 | 81.8   | 83.5 |
| Exclusive use                   | 1,789             | 19.5 | 18.3   | 20.7 | 1,947             | 23.1 | 21.7   | 24.4 | 3,052             | 21.4 | 20.4   | 22.4 | 2,118           | 14.6 | 13.8   | 15.4 |
| Cigarettes                      | 777               | 8.1  | 7.4    | 8.9  | 1,373             | 15.2 | 14.2   | 16.3 | 2,324             | 15.6 | 14.7   | 16.5 | 1,615           | 10.7 | 10.0   | 11.4 |
| ENDS                            | 282               | 3.1  | 2.7    | 3.6  | 145               | 1.8  | 1.5    | 2.2  | 185               | 1.2  | 1.0    | 1.5  | 114             | 0.8  | 0.7    | 1.0  |
| Other combustibles              | 592               | 6.7  | 5.9    | 7.5  | 304               | 4.1  | 3.5    | 4.8  | 286               | 2.6  | 2.2    | 3.0  | 234             | 1.9  | 1.6    | 2.2  |
| Smokeless                       | 138               | 1.6  | 1.3    | 1.8  | 125               | 1.9  | 1.5    | 2.3  | 257               | 2.0  | 1.8    | 2.3  | 155             | 1.2  | 1.0    | 1.4  |
| Dual use                        | 848               | 8.8  | 8.2    | 9.5  | 676               | 7.7  | 7.1    | 8.5  | 807               | 5.5  | 5.1    | 5.9  | 384             | 2.4  | 2.1    | 2.7  |
| Cigarettes + ENDS               | 177               | 1.9  | 1.6    | 2.3  | 205               | 2.4  | 2.0    | 2.8  | 363               | 2.4  | 2.1    | 2.7  | 159             | 1.0  | 0.8    | 1.2  |
| Cigarettes + other combustibles | 275               | 2.8  | 2.4    | 3.1  | 298               | 3.2  | 2.8    | 3.7  | 298               | 2.0  | 1.7    | 2.2  | 178             | 1.1  | 0.9    | 1.3  |
| Cigarettes + smokeless          | 68                | 0.8  | 0.6    | 1.0  | 71                | 0.8  | 0.6    | 1.0  | 75                | 0.6  | 0.5    | 0.8  | 19              | 0.1  | 0.1    | 0.2  |
| ENDS + other combustibles       | 254               | 2.6  | 2.2    | 3.1  | 73                | 0.9  | 0.7    | 1.3  | 28                | 0.2  | 0.1    | 0.3  | 11              | 0.1  | 0.0    | 0.1  |
| ENDS + smokeless                | 19                | 0.2  | 0.1    | 0.3  | 8                 | 0.1  | 0.0    | 0.2  | 7                 | 0.1  | 0.0    | 0.1  | 1               | 0.0  | 0.0    | 0.1  |
| Other combustibles + smokeless  | 55                | 0.6  | 0.4    | 0.8  | 21                | 0.3  | 0.2    | 0.6  | 36                | 0.3  | 0.2    | 0.4  | 16              | 0.1  | 0.1    | 0.2  |
| Poly use                        | 320               | 3.2  | 2.8    | 3.7  | 230               | 2.8  | 2.4    | 3.2  | 152               | 0.9  | 0.8    | 1.1  | 54              | 0.3  | 0.2    | 0.4  |

|                                             |     |     |     |     |     |     |     |     |    |     |     |     |    |     |     |     |
|---------------------------------------------|-----|-----|-----|-----|-----|-----|-----|-----|----|-----|-----|-----|----|-----|-----|-----|
| Cigarettes + ENDS + other combustibles      | 162 | 1.6 | 1.4 | 2.0 | 132 | 1.5 | 1.2 | 1.8 | 87 | 0.5 | 0.4 | 0.7 | 35 | 0.2 | 0.1 | 0.3 |
| Cigarettes + ENDS + smokeless               | 33  | 0.3 | 0.2 | 0.4 | 21  | 0.3 | 0.2 | 0.4 | 16 | 0.1 | 0.1 | 0.2 | 1  | 0.0 | 0.0 | 0.0 |
| Cigarettes + other combustibles + smokeless | 40  | 0.4 | 0.3 | 0.6 | 41  | 0.5 | 0.3 | 0.7 | 26 | 0.2 | 0.1 | 0.2 | 14 | 0.1 | 0.1 | 0.2 |
| ENDS + other combustibles + smokeless       | 28  | 0.3 | 0.2 | 0.4 | 11  | 0.2 | 0.1 | 0.6 | 3  | 0.0 | 0.0 | 0.1 | 0  | 0.0 |     |     |
| All four groups                             | 57  | 0.6 | 0.4 | 0.8 | 25  | 0.3 | 0.2 | 0.4 | 20 | 0.1 | 0.1 | 0.3 | 4  | 0.0 | 0.0 | 0.1 |

n = unweighted sample size; % = weighted percentage

ENDS = Electronic Nicotine Delivery Systems

**Supplemental Table 7b. Proportion of exclusive, dual, and polytobacco use among tobacco users by age: TUS-CPS (2014-2015), NHIS (2015), and PATH (2015-2016)**

|                                 | TUS-CPS (2014-2015) |      |        |      |                   |      |        |      |                    |      |        |      |                 |      |        |      |
|---------------------------------|---------------------|------|--------|------|-------------------|------|--------|------|--------------------|------|--------|------|-----------------|------|--------|------|
|                                 | 18-24 (n = 2,127)   |      |        |      | 25-34 (n = 5,550) |      |        |      | 35-54 (n = 10,890) |      |        |      | 55+ (n = 8,921) |      |        |      |
|                                 | n                   | %    | 95% CI |      | n                 | %    | 95% CI |      | n                  | %    | 95% CI |      | n               | %    | 95% CI |      |
|                                 |                     |      | LB     | UB   |                   |      | LB     | UB   |                    |      | LB     | UB   |                 |      | LB     | UB   |
| Exclusive use                   | 1,608               | 75.3 | 73.7   | 76.9 | 4,520             | 80.9 | 79.9   | 81.8 | 9,171              | 84.3 | 83.8   | 84.9 | 7,820           | 87.7 | 87.1   | 88.2 |
| Cigarettes                      | 1,073               | 49.3 | 47.4   | 51.1 | 3,360             | 59.7 | 58.6   | 60.7 | 7,144              | 65.5 | 64.8   | 66.3 | 6,163           | 69.2 | 68.4   | 70.0 |
| ENDS                            | 124                 | 6.0  | 5.2    | 7.0  | 236               | 4.4  | 4.0    | 4.9  | 396                | 3.7  | 3.4    | 4.1  | 258             | 2.7  | 2.5    | 3.0  |
| Other combustibles              | 258                 | 13.8 | 12.5   | 15.2 | 551               | 10.6 | 9.9    | 11.4 | 714                | 7.1  | 6.7    | 7.5  | 829             | 10.0 | 9.5    | 10.6 |
| Smokeless                       | 153                 | 6.3  | 5.5    | 7.1  | 373               | 6.2  | 5.6    | 6.8  | 917                | 8.0  | 7.6    | 8.4  | 570             | 5.7  | 5.3    | 6.1  |
| Dual use                        | 432                 | 20.3 | 19.0   | 21.8 | 902               | 16.8 | 15.9   | 17.7 | 1,571              | 14.3 | 13.8   | 14.9 | 1,032           | 11.5 | 11.0   | 12.1 |
| Cigarettes + ENDS               | 156                 | 7.0  | 6.1    | 8.1  | 451               | 8.2  | 7.6    | 8.8  | 907                | 8.3  | 7.9    | 8.7  | 628             | 6.8  | 6.4    | 7.2  |
| Cigarettes + other combustibles | 146                 | 7.3  | 6.4    | 8.4  | 229               | 5.1  | 4.6    | 5.7  | 416                | 3.9  | 3.7    | 4.3  | 302             | 3.5  | 3.2    | 3.9  |
| Cigarettes + smokeless          | 50                  | 2.0  | 1.6    | 2.5  | 122               | 1.8  | 1.5    | 2.1  | 161                | 1.3  | 1.1    | 1.5  | 44              | 0.5  | 0.4    | 0.6  |

|                                             |    |     |     |     |     |     |     |     |     |     |     |     |    |     |     |     |
|---------------------------------------------|----|-----|-----|-----|-----|-----|-----|-----|-----|-----|-----|-----|----|-----|-----|-----|
| ENDS + other combustibles                   | 47 | 2.3 | 1.8 | 2.9 | 41  | 0.8 | 0.6 | 1.1 | 21  | 0.2 | 0.2 | 0.3 | 13 | 0.2 | 0.1 | 0.3 |
| ENDS + smokeless                            | 6  | 0.3 | 0.1 | 0.5 | 15  | 0.2 | 0.2 | 0.4 | 16  | 0.2 | 0.1 | 0.2 | 4  | 0.0 | 0.0 | 0.1 |
| Other combustibles + smokeless              | 27 | 1.4 | 1.0 | 1.9 | 44  | 0.6 | 0.5 | 0.8 | 50  | 0.5 | 0.4 | 0.6 | 41 | 0.5 | 0.4 | 0.6 |
| Poly use                                    | 87 | 4.3 | 3.7 | 5.1 | 128 | 2.4 | 2.0 | 2.7 | 148 | 1.3 | 1.2 | 1.5 | 69 | 0.8 | 0.7 | 1.0 |
| Cigarettes + ENDS + other combustibles      | 43 | 2.1 | 1.6 | 2.6 | 61  | 1.2 | 1.0 | 1.6 | 84  | 0.8 | 0.6 | 0.9 | 41 | 0.5 | 0.4 | 0.7 |
| Cigarettes + ENDS + smokeless               | 12 | 0.6 | 0.4 | 0.9 | 28  | 0.5 | 0.4 | 0.7 | 22  | 0.2 | 0.1 | 0.3 | 9  | 0.1 | 0.1 | 0.2 |
| Cigarettes + other combustibles + smokeless | 22 | 1.1 | 0.8 | 1.5 | 26  | 0.4 | 0.3 | 0.6 | 30  | 0.3 | 0.2 | 0.4 | 14 | 0.2 | 0.1 | 0.3 |
| ENDS + other combustibles + smokeless       | 2  | 0.0 | 0.0 | 0.1 | 1   | 0.0 | 0.0 | 0.1 | 1   | 0.0 | 0.0 | 0.1 | 2  | 0.0 | 0.0 | 0.1 |
| All four groups                             | 8  | 0.5 | 0.3 | 0.9 | 12  | 0.2 | 0.1 | 0.3 | 11  | 0.1 | 0.1 | 0.2 | 3  | 0.0 | 0.0 | 0.1 |

**Supplemental Table 7b. Proportion of exclusive, dual, and polytobacco use among tobacco users by age: TUS-CPS (2014-2015), NHIS (2015), and PATH (2015-2016) – CONTINUED**

|                    | NHIS (2015)     |      |        |      |                   |      |        |      |                   |      |        |      |                 |      |        |      |
|--------------------|-----------------|------|--------|------|-------------------|------|--------|------|-------------------|------|--------|------|-----------------|------|--------|------|
|                    | 18-24 (n = 617) |      |        |      | 25-34 (n = 1,349) |      |        |      | 35-54 (n = 2,517) |      |        |      | 55+ (n = 2,092) |      |        |      |
|                    | n               | %    | 95% CI |      | n                 | %    | 95% CI |      | n                 | %    | 95% CI |      | n               | %    | 95% CI |      |
|                    |                 |      | LB     | UB   |                   |      | LB     | UB   |                   |      | LB     | UB   |                 |      | LB     | UB   |
| Exclusive use      | 456             | 76.3 | 71.4   | 80.7 | 1,053             | 78.9 | 75.8   | 81.8 | 2,005             | 79.9 | 77.7   | 81.9 | 1,757           | 84.5 | 82.3   | 86.6 |
| Cigarettes         | 252             | 39.3 | 33.9   | 44.9 | 743               | 53.9 | 50.4   | 57.3 | 1,522             | 58.0 | 55.0   | 60.9 | 1,380           | 62.6 | 59.5   | 65.7 |
| ENDS               | 51              | 11.1 | 8.1    | 15.1 | 80                | 6.4  | 4.9    | 8.3  | 108               | 5.8  | 4.7    | 7.0  | 78              | 4.2  | 3.2    | 5.6  |
| Other combustibles | 109             | 19.0 | 15.1   | 23.6 | 144               | 12.4 | 10.0   | 15.2 | 191               | 8.8  | 7.1    | 10.8 | 191             | 10.9 | 9.1    | 13.0 |

|                                             |     |      |      |      |     |      |      |      |     |      |      |      |     |      |      |      |
|---------------------------------------------|-----|------|------|------|-----|------|------|------|-----|------|------|------|-----|------|------|------|
| Smokeless                                   | 44  | 6.9  | 4.7  | 10.2 | 86  | 6.3  | 4.7  | 8.4  | 184 | 7.3  | 5.9  | 9.0  | 108 | 6.8  | 5.1  | 9.0  |
| Dual use                                    | 130 | 18.6 | 14.7 | 23.4 | 246 | 16.8 | 14.4 | 19.5 | 461 | 18.2 | 16.3 | 20.3 | 310 | 14.3 | 12.3 | 16.5 |
| Cigarettes + ENDS                           | 53  | 7.1  | 5.2  | 9.8  | 95  | 6.1  | 4.6  | 8.0  | 240 | 9.7  | 8.3  | 11.2 | 155 | 7.3  | 5.9  | 9.1  |
| Cigarettes + other combustibles             | 36  | 4.0  | 2.4  | 6.4  | 93  | 6.6  | 5.0  | 8.6  | 136 | 5.3  | 4.2  | 6.6  | 123 | 5.2  | 3.9  | 6.7  |
| Cigarettes + smokeless                      | 19  | 3.9  | 2.0  | 7.6  | 32  | 2.3  | 1.4  | 3.8  | 41  | 1.3  | 0.9  | 2.0  | 18  | 1.0  | 0.5  | 1.9  |
| ENDS + other combustibles                   | 11  | 2.1  | 1.0  | 4.4  | 11  | 0.9  | 0.4  | 2.1  | 6   | 0.2  | 0.1  | 0.5  | 3   | 0.1  | 0.0  | 0.4  |
| ENDS + smokeless                            | 3   | 0.4  | 0.1  | 2.6  | 3   | 0.2  | 0.1  | 0.9  | 4   | 0.1  | 0.0  | 0.5  | 2   | 0.0  | 0.0  | 0.2  |
| Other combustibles + smokeless              | 8   | 1.0  | 0.5  | 2.4  | 12  | 0.6  | 0.3  | 1.3  | 34  | 1.5  | 0.9  | 2.6  | 9   | 0.6  | 0.3  | 1.4  |
| Poly use                                    | 31  | 5.0  | 3.2  | 7.9  | 50  | 4.3  | 2.9  | 6.3  | 51  | 1.9  | 1.4  | 2.7  | 25  | 1.2  | 0.7  | 2.0  |
| Cigarettes + ENDS + other combustibles      | 18  | 2.5  | 1.4  | 4.6  | 29  | 2.7  | 1.6  | 4.4  | 29  | 1.0  | 0.7  | 1.6  | 13  | 0.7  | 0.3  | 1.4  |
| Cigarettes + ENDS + smokeless               | 0   | 0.0  | 0.0  | 0.0  | 7   | 0.6  | 0.2  | 1.6  | 9   | 0.4  | 0.2  | 0.9  | 4   | 0.1  | 0.0  | 0.7  |
| Cigarettes + other combustibles + smokeless | 9   | 1.7  | 0.7  | 4.2  | 8   | 0.4  | 0.1  | 1.1  | 10  | 0.4  | 0.2  | 1.0  | 7   | 0.3  | 0.1  | 0.9  |
| ENDS + other combustibles + smokeless       | 2   | 0.2  | 0.0  | 1.0  | 2   | 0.1  | 0.0  | 0.3  | 0   | 0.0  | 0.0  | 0.0  | 0   | 0.0  | 0.0  | 0.0  |
| All four groups                             | 2   | 0.6  | 0.1  | 2.6  | 4   | 0.5  | 0.1  | 2.1  | 3   | 0.1  | 0.0  | 0.3  | 1   | 0.1  | 0.0  | 0.5  |

**Supplemental Table 7b. Proportion of exclusive, dual, and polytobacco use among tobacco users by age: TUS-CPS (2014-2015), NHIS (2015), and PATH (2015-2016) – CONTINUED**

|  | PATH (2015-2016)  |                   |                   |                 |
|--|-------------------|-------------------|-------------------|-----------------|
|  | 18-24 (n = 2,957) | 25-34 (n = 2,853) | 35-54 (n = 4,011) | 55+ (n = 2,556) |

|                                             | n     | %    | 95% CI |      | n     | %    | 95% CI |      | n     | %    | 95% CI |      | n     | %    | 95% CI |      |
|---------------------------------------------|-------|------|--------|------|-------|------|--------|------|-------|------|--------|------|-------|------|--------|------|
|                                             |       |      | LB     | UB   |
| Exclusive use                               | 1,789 | 61.8 | 59.8   | 63.8 | 1,947 | 68.7 | 66.7   | 70.6 | 3,052 | 76.9 | 75.4   | 78.4 | 2,118 | 84.3 | 82.6   | 85.7 |
| Cigarettes                                  | 777   | 25.8 | 23.8   | 27.9 | 1,373 | 45.3 | 43.3   | 47.3 | 2,324 | 55.9 | 53.8   | 58.0 | 1,615 | 61.5 | 59.2   | 63.8 |
| ENDS                                        | 282   | 9.9  | 8.7    | 11.3 | 145   | 5.5  | 4.6    | 6.6  | 185   | 4.5  | 3.7    | 5.4  | 114   | 4.9  | 4.0    | 5.9  |
| Other combustibles                          | 592   | 21.1 | 19.1   | 23.3 | 304   | 12.2 | 10.6   | 14.1 | 286   | 9.3  | 8.0    | 10.7 | 234   | 11.0 | 9.4    | 12.8 |
| Smokeless                                   | 138   | 4.9  | 4.2    | 5.9  | 125   | 5.7  | 4.6    | 7.0  | 257   | 7.3  | 6.3    | 8.4  | 155   | 6.9  | 5.8    | 8.1  |
| Dual use                                    | 848   | 28.0 | 26.1   | 30.0 | 676   | 23.1 | 21.3   | 25.0 | 807   | 19.7 | 18.3   | 21.2 | 384   | 13.9 | 12.5   | 15.4 |
| Cigarettes + ENDS                           | 177   | 6.1  | 5.1    | 7.2  | 205   | 7.1  | 6.0    | 8.3  | 363   | 8.6  | 7.7    | 9.7  | 159   | 5.9  | 5.0    | 7.1  |
| Cigarettes + other combustibles             | 275   | 8.8  | 7.7    | 9.9  | 298   | 9.7  | 8.5    | 11.0 | 298   | 7.0  | 6.1    | 8.1  | 178   | 6.2  | 5.2    | 7.4  |
| Cigarettes + smokeless                      | 68    | 2.4  | 1.9    | 3.1  | 71    | 2.4  | 1.9    | 3.0  | 75    | 2.2  | 1.7    | 2.7  | 19    | 0.8  | 0.5    | 1.3  |
| ENDS + other combustibles                   | 254   | 8.3  | 7.2    | 9.7  | 73    | 2.8  | 2.0    | 3.7  | 28    | 0.8  | 0.5    | 1.2  | 11    | 0.4  | 0.2    | 0.7  |
| ENDS + smokeless                            | 19    | 0.6  | 0.4    | 0.9  | 8     | 0.3  | 0.1    | 0.7  | 7     | 0.2  | 0.1    | 0.4  | 1     | 0.1  | 0.0    | 0.4  |
| Other combustibles + smokeless              | 55    | 1.8  | 1.4    | 2.5  | 21    | 0.9  | 0.5    | 1.7  | 36    | 0.9  | 0.6    | 1.3  | 16    | 0.5  | 0.3    | 0.9  |
| Poly use                                    | 320   | 10.2 | 9.0    | 11.5 | 230   | 8.2  | 7.0    | 9.6  | 152   | 3.4  | 2.8    | 4.1  | 54    | 1.9  | 1.4    | 2.6  |
| Cigarettes + ENDS + other combustibles      | 162   | 5.2  | 4.3    | 6.2  | 132   | 4.5  | 3.7    | 5.4  | 87    | 1.9  | 1.4    | 2.4  | 35    | 1.2  | 0.8    | 1.8  |
| Cigarettes + ENDS + smokeless               | 33    | 1.0  | 0.7    | 1.4  | 21    | 0.8  | 0.6    | 1.2  | 16    | 0.3  | 0.2    | 0.6  | 1     | 0.0  | 0.0    | 0.1  |
| Cigarettes + other combustibles + smokeless | 40    | 1.3  | 0.9    | 1.8  | 41    | 1.4  | 1.0    | 2.0  | 26    | 0.6  | 0.4    | 0.9  | 14    | 0.5  | 0.3    | 1.0  |
| ENDS + other combustibles + smokeless       | 28    | 0.8  | 0.6    | 1.3  | 11    | 0.6  | 0.2    | 1.9  | 3     | 0.1  | 0.0    | 0.3  | 0     | 0.0  |        |      |

|                 |    |     |     |     |    |     |     |     |    |     |     |     |   |     |     |     |
|-----------------|----|-----|-----|-----|----|-----|-----|-----|----|-----|-----|-----|---|-----|-----|-----|
| All four groups | 57 | 1.9 | 1.4 | 2.5 | 25 | 0.9 | 0.6 | 1.3 | 20 | 0.5 | 0.3 | 0.9 | 4 | 0.1 | 0.0 | 0.3 |
|-----------------|----|-----|-----|-----|----|-----|-----|-----|----|-----|-----|-----|---|-----|-----|-----|

n = unweighted sample size; % = weighted percentage

ENDS = Electronic Nicotine Delivery Systems

**Supplemental Table 8. Types of other combustible products used among other combustible product users: TUS-CPS (2014-2015), NHIS (2015), and PATH (2015-2016)**

|                    | TUS-CPS (2014-2015) |      |        |      | NHIS (2015) |      |        |      | PATH (2015-2016) |      |        |      |
|--------------------|---------------------|------|--------|------|-------------|------|--------|------|------------------|------|--------|------|
|                    | n                   | %    | 95% CI |      | n           | %    | 95% CI |      | n                | %    | 95% CI |      |
|                    |                     |      | LB     | UB   |             |      | LB     | UB   |                  |      | LB     | UB   |
| Traditional cigars | 3,262               | 78.6 | 77.4   | 79.7 | 996         | 81.2 | 77.8   | 84.1 | 1435             | 46.8 | 44.8   | 48.8 |
| Cigarillos         |                     |      |        |      |             |      |        |      | 1309             | 34.9 | 32.9   | 37.0 |
| Filtered cigars    |                     |      |        |      |             |      |        |      | 776              | 20.2 | 18.5   | 22.1 |
| Tobacco pipe       | 593                 | 12.5 | 11.6   | 13.5 | 359         | 27.8 | 24.1   | 31.8 | 341              | 9.4  | 8.1    | 10.8 |
| Hookah             | 662                 | 20.3 | 18.9   | 21.2 |             |      |        |      | 1388             | 30.8 | 28.8   | 32.9 |

n = unweighted sample size; % = weighted percentage

Categories are not mutually exclusive

**Supplemental Table 9. Sensitivity analysis comparing the impact of different product use definitions on exclusive, dual, and polytobacco use: TUS-CPS (2014-2015), NHIS (2015), and PATH (2015-2016)**

|                    | TUS-CPS (2014-2015)                     |      |        |      |                                          |      |        |      |                                           |      |        |      |                                           |      |        |      |
|--------------------|-----------------------------------------|------|--------|------|------------------------------------------|------|--------|------|-------------------------------------------|------|--------|------|-------------------------------------------|------|--------|------|
|                    | Every day or some days<br>(n = 155,067) |      |        |      | 1+ days in past 30 days<br>(n = 154,876) |      |        |      | 10+ days in past 30 days<br>(n = 154,876) |      |        |      | 25+ days in past 30 days<br>(n = 154,876) |      |        |      |
|                    | n                                       | %    | 95% CI |      | n                                        | %    | 95% CI |      | n                                         | %    | 95% CI |      | n                                         | %    | 95% CI |      |
| LB                 |                                         |      | UB     | LB   |                                          |      | UB     | LB   |                                           |      | UB     | LB   |                                           |      | UB     |      |
| Non-user           | 127579                                  | 82.7 | 82.6   | 82.9 | 128,488                                  | 83.4 | 83.3   | 83.6 | 131,090                                   | 85.3 | 85.1   | 85.4 | 134,201                                   | 87.3 | 87.2   | 87.5 |
| Exclusive use      | 23119                                   | 14.4 | 14.2   | 14.5 | 22,743                                   | 14.2 | 14.0   | 14.3 | 22,046                                    | 13.6 | 13.5   | 13.8 | 19,826                                    | 12.1 | 12.0   | 12.3 |
| Cigarettes         | 17740                                   | 10.9 | 10.8   | 11.0 | 18,020                                   | 11.1 | 11.0   | 11.2 | 18,547                                    | 11.4 | 11.3   | 11.5 | 16,864                                    | 10.3 | 10.2   | 10.4 |
| ENDS               | 1014                                    | 0.7  | 0.6    | 0.7  | 1,005                                    | 0.7  | 0.6    | 0.7  | 920                                       | 0.6  | 0.6    | 0.7  | 826                                       | 0.6  | 0.5    | 0.6  |
| Other combustibles | 2352                                    | 1.6  | 1.6    | 1.7  | 1,692                                    | 1.2  | 1.2    | 1.3  | 654                                       | 0.4  | 0.4    | 0.5  | 444                                       | 0.3  | 0.3    | 0.3  |

|                                             |      |     |     |     |       |     |     |     |       |     |     |     |       |     |     |     |
|---------------------------------------------|------|-----|-----|-----|-------|-----|-----|-----|-------|-----|-----|-----|-------|-----|-----|-----|
| Smokeless                                   | 2013 | 1.2 | 1.1 | 1.2 | 2,026 | 1.2 | 1.1 | 1.2 | 1,925 | 1.1 | 1.1 | 1.2 | 1,692 | 1.0 | 1.0 | 1.0 |
| Dual use                                    | 3937 | 2.6 | 2.5 | 2.6 | 3,346 | 2.2 | 2.1 | 2.3 | 1,683 | 1.1 | 1.0 | 1.1 | 831   | 0.5 | 0.5 | 0.6 |
| Cigarettes + ENDS                           | 2142 | 1.3 | 1.3 | 1.4 | 1,971 | 1.2 | 1.2 | 1.3 | 1,075 | 0.7 | 0.6 | 0.7 | 475   | 0.3 | 0.3 | 0.3 |
| Cigarettes + other combustibles             | 1093 | 0.8 | 0.7 | 0.8 | 805   | 0.6 | 0.6 | 0.6 | 298   | 0.2 | 0.2 | 0.2 | 209   | 0.1 | 0.1 | 0.2 |
| Cigarettes + smokeless                      | 377  | 0.2 | 0.2 | 0.2 | 356   | 0.2 | 0.2 | 0.2 | 255   | 0.2 | 0.1 | 0.2 | 128   | 0.1 | 0.1 | 0.1 |
| ENDS + other combustibles                   | 122  | 0.1 | 0.1 | 0.1 | 81    | 0.1 | 0.1 | 0.1 | 17    | 0.0 | 0.0 | 0.0 | 11    | 0.0 | 0.0 | 0.0 |
| ENDS + smokeless                            | 41   | 0.0 | 0.0 | 0.0 | 37    | 0.0 | 0.0 | 0.0 | 23    | 0.0 | 0.0 | 0.0 | 5     | 0.0 | 0.0 | 0.0 |
| Other combustibles + smokeless              | 162  | 0.1 | 0.1 | 0.1 | 96    | 0.1 | 0.1 | 0.1 | 15    | 0.0 | 0.0 | 0.0 | 3     | 0.0 | 0.0 | 0.0 |
| Poly use                                    | 432  | 0.3 | 0.3 | 0.3 | 299   | 0.2 | 0.2 | 0.2 | 57    | 0.0 | 0.0 | 0.0 | 18    | 0.0 | 0.0 | 0.0 |
| Cigarettes + ENDS + other combustibles      | 229  | 0.2 | 0.1 | 0.2 | 151   | 0.1 | 0.1 | 0.1 | 23    | 0.0 | 0.0 | 0.0 | 7     | 0.0 | 0.0 | 0.0 |
| Cigarettes + ENDS + smokeless               | 71   | 0.1 | 0.0 | 0.1 | 63    | 0.0 | 0.0 | 0.1 | 22    | 0.0 | 0.0 | 0.0 | 5     | 0.0 | 0.0 | 0.0 |
| Cigarettes + other combustibles + smokeless | 92   | 0.1 | 0.1 | 0.1 | 60    | 0.0 | 0.0 | 0.1 | 10    | 0.0 | 0.0 | 0.0 | 5     | 0.0 | 0.0 | 0.0 |
| ENDS + other combustibles + smokeless       | 6    | 0.0 | 0.0 | 0.0 | 2     | 0.0 | 0.0 | 0.0 | 1     | 0.0 | 0.0 | 0.0 | 0     | 0.0 |     |     |
| All four groups                             | 34   | 0.0 | 0.0 | 0.0 | 23    | 0.0 | 0.0 | 0.0 | 1     | 0.0 | 0.0 | 0.0 | 1     | 0.0 | 0.0 | 0.0 |

**Supplemental Table 9. Sensitivity analysis comparing the impact of different product use definitions on exclusive, dual, and polytobacco use: TUS-CPS (2014-2015), NHIS (2015), and PATH (2015-2016) – CONTINUED**

|  |              |
|--|--------------|
|  | NHIS (2015)* |
|--|--------------|

|                                              | Every day or some days<br>(n = 31,680) |      |        |      | 1+ days in past 30 days<br>(n = 31,662) |      |        |      | 10+ days in past 30 days<br>(n = 31,662) |      |        |      | 25+ days in past 30 days<br>(n = 31,662) |      |        |      |
|----------------------------------------------|----------------------------------------|------|--------|------|-----------------------------------------|------|--------|------|------------------------------------------|------|--------|------|------------------------------------------|------|--------|------|
|                                              | n                                      | %    | 95% CI |      | n                                       | %    | 95% CI |      | n                                        | %    | 95% CI |      | n                                        | %    | 95% CI |      |
|                                              |                                        |      | LB     | UB   |                                         |      | LB     | UB   |                                          |      | LB     | UB   |                                          |      | LB     | UB   |
| Non-user                                     | 25,105                                 | 79.7 | 79.0   | 80.3 | 25,330                                  | 80.5 | 79.8   | 81.2 | 25,944                                   | 82.6 | 81.9   | 83.2 | 26,643                                   | 84.8 | 84.2   | 85.4 |
| Exclusive use                                | 5,271                                  | 16.4 | 15.8   | 17.0 | 5,249                                   | 16.2 | 15.6   | 16.8 | 5,113                                    | 15.6 | 15.0   | 16.3 | 4,661                                    | 14.1 | 13.5   | 14.7 |
| Cigarettes                                   | 3,897                                  | 11.4 | 10.9   | 11.9 | 3,997                                   | 11.7 | 11.2   | 12.2 | 4,089                                    | 12.0 | 11.4   | 12.5 | 3,725                                    | 10.9 | 10.3   | 11.4 |
| ENDS                                         | 317                                    | 1.3  | 1.1    | 1.4  | 314                                     | 1.3  | 1.1    | 1.4  | 266                                      | 1.0  | 0.9    | 1.2  | 244                                      | 0.9  | 0.8    | 1.0  |
| Other combustibles                           | 635                                    | 2.3  | 2.1    | 2.6  | 503                                     | 1.8  | 1.6    | 2.1  | 333                                      | 1.2  | 1.0    | 1.4  | 323                                      | 1.2  | 1.0    | 1.3  |
| Smokeless                                    | 422                                    | 1.4  | 1.2    | 1.6  | 435                                     | 1.4  | 1.2    | 1.7  | 425                                      | 1.4  | 1.2    | 1.6  | 369                                      | 1.2  | 1.0    | 1.5  |
| Dual use                                     | 1,147                                  | 3.4  | 3.2    | 3.7  | 975                                     | 2.9  | 2.7    | 3.2  | 572                                      | 1.7  | 1.5    | 1.9  | 351                                      | 1.0  | 0.9    | 1.2  |
| Cigarettes +<br>ENDS                         | 543                                    | 1.6  | 1.4    | 1.8  | 488                                     | 1.4  | 1.3    | 1.6  | 268                                      | 0.8  | 0.7    | 1.0  | 118                                      | 0.4  | 0.3    | 0.5  |
| Cigarettes +<br>other<br>combustibles        | 388                                    | 1.1  | 0.9    | 1.3  | 306                                     | 0.9  | 0.8    | 1.0  | 197                                      | 0.6  | 0.5    | 0.7  | 176                                      | 0.5  | 0.4    | 0.6  |
| Cigarettes +<br>smokeless                    | 110                                    | 0.4  | 0.3    | 0.5  | 109                                     | 0.4  | 0.3    | 0.5  | 76                                       | 0.2  | 0.2    | 0.3  | 38                                       | 0.1  | 0.1    | 0.2  |
| ENDS + other<br>combustibles                 | 31                                     | 0.1  | 0.1    | 0.2  | 24                                      | 0.1  | 0.0    | 0.1  | 13                                       | 0.0  | 0.0    | 0.1  | 8                                        | 0.0  | 0.0    | 0.0  |
| ENDS +<br>smokeless                          | 12                                     | 0.0  | 0.0    | 0.1  | 13                                      | 0.0  | 0.0    | 0.1  | 7                                        | 0.0  | 0.0    | 0.1  | 3                                        | 0.0  | 0.0    | 0.0  |
| Other<br>combustibles +<br>smokeless         | 63                                     | 0.2  | 0.1    | 0.3  | 35                                      | 0.1  | 0.1    | 0.2  | 11                                       | 0.0  | 0.0    | 0.1  | 8                                        | 0.0  | 0.0    | 0.0  |
| Poly use                                     | 157                                    | 0.5  | 0.4    | 0.7  | 108                                     | 0.4  | 0.3    | 0.5  | 33                                       | 0.1  | 0.1    | 0.2  | 7                                        | 0.0  | 0.0    | 0.1  |
| Cigarettes +<br>ENDS + other<br>combustibles | 89                                     | 0.3  | 0.2    | 0.4  | 68                                      | 0.2  | 0.2    | 0.3  | 22                                       | 0.1  | 0.0    | 0.2  | 4                                        | 0.0  | 0.0    | 0.1  |
| Cigarettes +<br>ENDS +<br>smokeless          | 20                                     | 0.1  | 0.0    | 0.1  | 12                                      | 0.0  | 0.0    | 0.1  | 3                                        | 0.0  | 0.0    | 0.0  | 0                                        | 0.0  | 0.0    | 0.0  |



|                                             |    |     |     |     |    |     |     |     |   |     |     |     |   |     |     |     |
|---------------------------------------------|----|-----|-----|-----|----|-----|-----|-----|---|-----|-----|-----|---|-----|-----|-----|
| Cigarettes + other combustibles + smokeless | 34 | 0.1 | 0.1 | 0.2 | 21 | 0.1 | 0.0 | 0.1 | 7 | 0.0 | 0.0 | 0.0 | 3 | 0.0 | 0.0 | 0.0 |
| ENDS + other combustibles + smokeless       | 4  | 0.0 | 0.0 | 0.0 | 1  | 0.0 | 0.0 | 0.0 | 0 | 0.0 | 0.0 | 0.0 | 0 | 0.0 | 0.0 | 0.0 |
| All four groups                             | 10 | 0.0 | 0.0 | 0.1 | 6  | 0.0 | 0.0 | 0.1 | 1 | 0.0 | 0.0 | 0.0 | 0 | 0.0 | 0.0 | 0.0 |

**Supplemental Table 9. Sensitivity analysis comparing the impact of different product use definitions on exclusive, dual, and polytobacco use: TUS-CPS (2014-2015), NHIS (2015), and PATH (2015-2016) – CONTINUED**

|                                 | PATH (2015-2016)                       |      |        |      |                                         |      |        |      |                                          |      |        |      |                                          |      |        |      |
|---------------------------------|----------------------------------------|------|--------|------|-----------------------------------------|------|--------|------|------------------------------------------|------|--------|------|------------------------------------------|------|--------|------|
|                                 | Every day or some days<br>(n = 28,070) |      |        |      | 1+ days in past 30 days<br>(n = 28,019) |      |        |      | 10+ days in past 30 days<br>(n = 28,019) |      |        |      | 25+ days in past 30 days<br>(n = 28,019) |      |        |      |
|                                 | n                                      | %    | 95% CI |      | n                                       | %    | 95% CI |      | n                                        | %    | 95% CI |      | n                                        | %    | 95% CI |      |
| LB                              |                                        |      | UB     | LB   |                                         |      | UB     | LB   |                                          |      | UB     | LB   |                                          |      | UB     |      |
| Non-user                        | 15,693                                 | 74.6 | 73.9   | 75.2 | 16,258                                  | 75.9 | 75.3   | 76.5 | 18,064                                   | 79.8 | 79.2   | 80.4 | 19,049                                   | 81.8 | 81.2   | 82.3 |
| Exclusive use                   | 8,906                                  | 18.9 | 18.4   | 19.5 | 9,038                                   | 19.0 | 18.5   | 19.6 | 8,862                                    | 18.1 | 17.6   | 18.7 | 8,374                                    | 17.1 | 16.6   | 17.6 |
| Cigarettes                      | 6,089                                  | 12.8 | 12.3   | 13.3 | 6,522                                   | 13.6 | 13.1   | 14.1 | 7,072                                    | 14.3 | 13.8   | 14.8 | 6,780                                    | 13.7 | 13.2   | 14.2 |
| ENDS                            | 726                                    | 1.4  | 1.3    | 1.6  | 747                                     | 1.5  | 1.4    | 1.6  | 717                                      | 1.4  | 1.3    | 1.5  | 660                                      | 1.3  | 1.2    | 1.5  |
| Other combustibles              | 1,416                                  | 3.1  | 2.9    | 3.3  | 1,052                                   | 2.2  | 2.0    | 2.4  | 338                                      | 0.7  | 0.6    | 0.8  | 249                                      | 0.5  | 0.4    | 0.6  |
| Smokeless                       | 675                                    | 1.6  | 1.5    | 1.8  | 717                                     | 1.7  | 1.5    | 1.9  | 735                                      | 1.7  | 1.5    | 1.9  | 685                                      | 1.6  | 1.4    | 1.7  |
| Dual use                        | 2,715                                  | 5.2  | 4.9    | 5.4  | 2,260                                   | 4.3  | 4.1    | 4.5  | 1,006                                    | 2.0  | 1.8    | 2.1  | 569                                      | 1.1  | 1.0    | 1.2  |
| Cigarettes + ENDS               | 904                                    | 1.8  | 1.7    | 2.0  | 827                                     | 1.7  | 1.5    | 1.8  | 442                                      | 0.9  | 0.8    | 1.0  | 227                                      | 0.5  | 0.4    | 0.5  |
| Cigarettes + other combustibles | 1,049                                  | 2.0  | 1.8    | 2.1  | 857                                     | 1.6  | 1.4    | 1.7  | 318                                      | 0.6  | 0.5    | 0.7  | 207                                      | 0.4  | 0.3    | 0.5  |
| Cigarettes + smokeless          | 233                                    | 0.5  | 0.4    | 0.6  | 243                                     | 0.5  | 0.4    | 0.6  | 157                                      | 0.3  | 0.3    | 0.4  | 82                                       | 0.2  | 0.1    | 0.2  |
| ENDS + other combustibles       | 366                                    | 0.6  | 0.5    | 0.7  | 225                                     | 0.4  | 0.3    | 0.4  | 38                                       | 0.1  | 0.0    | 0.1  | 26                                       | 0.0  | 0.0    | 0.1  |

|                                             |     |     |     |     |     |     |     |     |    |     |     |     |    |     |     |     |
|---------------------------------------------|-----|-----|-----|-----|-----|-----|-----|-----|----|-----|-----|-----|----|-----|-----|-----|
| ENDS + smokeless                            | 35  | 0.1 | 0.0 | 0.1 | 38  | 0.1 | 0.0 | 0.1 | 29 | 0.1 | 0.0 | 0.1 | 19 | 0.0 | 0.0 | 0.1 |
| Other combustibles + smokeless              | 128 | 0.2 | 0.2 | 0.3 | 70  | 0.1 | 0.1 | 0.2 | 22 | 0.0 | 0.0 | 0.1 | 8  | 0.0 | 0.0 | 0.0 |
| Poly use                                    | 756 | 1.3 | 1.2 | 1.4 | 463 | 0.8 | 0.7 | 0.9 | 87 | 0.1 | 0.1 | 0.2 | 27 | 0.0 | 0.0 | 0.1 |
| Cigarettes + ENDS + other combustibles      | 416 | 0.7 | 0.6 | 0.8 | 257 | 0.4 | 0.4 | 0.5 | 38 | 0.1 | 0.0 | 0.1 | 10 | 0.0 | 0.0 | 0.0 |
| Cigarettes + ENDS + smokeless               | 71  | 0.1 | 0.1 | 0.2 | 57  | 0.1 | 0.1 | 0.1 | 26 | 0.0 | 0.0 | 0.1 | 2  | 0.0 | 0.0 | 0.0 |
| Cigarettes + other combustibles + smokeless | 121 | 0.2 | 0.2 | 0.3 | 66  | 0.1 | 0.1 | 0.1 | 12 | 0.0 | 0.0 | 0.0 | 7  | 0.0 | 0.0 | 0.0 |
| ENDS + other combustibles + smokeless       | 42  | 0.1 | 0.0 | 0.1 | 29  | 0.0 | 0.0 | 0.0 | 2  | 0.0 | 0.0 | 0.0 | 2  | 0.0 | 0.0 | 0.0 |
| All four groups                             | 106 | 0.2 | 0.1 | 0.2 | 54  | 0.1 | 0.1 | 0.1 | 9  | 0.0 | 0.0 | 0.0 | 6  | 0.0 | 0.0 | 0.0 |

All definitions use established use criteria (100+ lifetime cigarettes) to define current cigarette smokers

Due to variations in skip patterns across surveys, all respondents who reported using a product every day were coded as using that product on 30 out of 30 days and all respondents who reported using a product not at all were coded as using that product on 0 out of 30 days

\*pipes defined as every day some day across definitions
